# Spectral inference reveals principal cone-integration rules of the zebrafish inner retina

Philipp Bartel<sup>1</sup>, Takeshi Yoshimatsu<sup>1</sup>, Filip K Janiak<sup>1</sup>, and Tom Baden<sup>1,2§</sup>

**ABSTRACT.** In the vertebrate retina, bipolar cells integrate the signals from different cone types at two main sites: directly, via dendritic inputs in the outer retina, and indirectly, via axonal inputs in the inner retina. Of these, the functional wiring of the indirect route, involving diverse amacrine cell circuits, remains largely uncharted. However, because cone-photoreceptor types differ in their spectral sensitivities, insights into the total functional cone-integration logic of bipolar cell might be gained by linking spectral responses across these two populations of neurons. To explore the feasibility of such a “spectral-circuit-mapping” approach, we here recorded *in vivo* responses of bipolar cell presynaptic terminals in larval zebrafish to widefield but spectrally resolved flashes of light. We then mapped the results onto the previously established spectral sensitivity functions of the four cones.

We find that this approach could explain ~95% of the spectral and temporal variance of bipolar cell responses by way of a simple linear model that combined weighted inputs from the cones with four stereotyped temporal components. This in turn revealed several notable integration rules of the inner retina. Overall, bipolar cells were dominated by red-cone inputs, often alongside equal sign inputs from blue- and green-cones. In contrast, UV-cone inputs were uncorrelated with those of the remaining cones. This led to a new axis of spectral opponency which was mainly set-up by red-/green-/blue-cone “Off” circuits connecting to “natively-On” UV-cone circuits in the outermost fraction of the inner plexiform layer – much as how key colour opponent circuits are established in mammals. Beyond this, and despite substantial temporal diversity that was not present in the cones, bipolar cell spectral tunings were surprisingly simple. They either approximately resembled both opponent and non-opponent spectral motifs already present in the cones or exhibited a stereotyped non-opponent broadband response. In this way, bipolar cells not only preserved the efficient spectral representations in the cones, but also diversified them to set up a total of six dominant spectral motifs which included three axes of spectral opponency. More generally, our results contribute to an emerging understanding of how retinal circuits for colour vision in ancestral cone-tetrachromats such as zebrafish may be linked to those found in mammals.

---

1, School of Life Sciences, University of Sussex, UK; 2, Institute of Ophthalmic Research, University of Tübingen, Germany. §Correspondence to [t.baden@sussex.ac.uk](mailto:t.baden@sussex.ac.uk)

**Acknowledgements.** We thank Daniel Osorio and Thomas Euler for critical feedback. The authors would also like to acknowledge support from the FENS-Kavli Network of Excellence and the EMBO YIP. **Author contributions.** PB, TY and TB designed the study. TY performed 2-photon data collection. PB devised the light stimulator. PB and TB performed analysis. FKJ built the custom 2-photon microscope and established the non-telecentric multiplane imaging approach. TB wrote the manuscript with inputs from all authors. **Declaration of Interests.** The authors declare no competing interests.

**Funding.** Funding was provided by the Wellcome Trust (Investigator Award in Science 220277/Z20/Z to TB), the European Research Council (ERC-StG “NeuroVisEco” 677687 to TB), UKRI (BBSRC, BB/R014817/1 to TB), the Leverhulme Trust (PLP-2017-005 and RPG-2021-026 to TB) and the Lister Institute for Preventive Medicine (to TB).

53

## INTRODUCTION

54

55

56

57

58

59

60

61

62

63

64

65

66

For colour vision, retinal circuits combine and contrast the signals from spectrally distinct types of photoreceptors<sup>1</sup>. For this, our own trichromatic vision uses spectral signals along two main opponent axes: “blue-yellow” and “green-red”<sup>2–5</sup>. Of these, blue-yellow comparisons are based on ancestral cone-type selective retinal circuits that differentially contact SWS1- (“blue”) and LWS-cones (“green/red”, aka. “yellow”), while reliably contrasting “green-red” is thought to require the central brain<sup>1,5,6</sup>. This is because primate “green”- and “red-cones” emerged from a relatively recent LWS gene duplication that enabled new green sensitivity in some LWS-cones, however without providing a known means for postsynaptic retinal circuits to distinguish between “green” and “red” LWS-cone variants<sup>3,7</sup>. Accordingly, in our own eyes, one axis of spectral opponency arises in the retina, and a second is probably decoded only in the brain.

67

68

69

70

71

72

73

74

75

76

77

78

79

In contrast, most non-mammalian vertebrate lineages, including fish, amphibians, reptiles, and birds, retain the full complement of ancestral cone-types based on four opsin-gene families: SWS1 (UV-cones), SWS2 (blue-cones), RH2 (green-cones), LWS (red-cones)<sup>1,8–10</sup>. These feed into cone-type selective circuits in the outer retina (e.g. zebrafish<sup>11–13</sup>, chicken<sup>14–16</sup>). Accordingly, in these non-mammalian lineages, the expectation is that up to tetrachromatic colour vision should be possible based on cone-opponent ancestral circuits that are developmentally hardwired into the retinal fabric, without a necessity for building additional spectral opponencies in the brain. In agreement, physiological recordings from retinal neurons in cone-tetrachromatic species including turtles<sup>17</sup> and diverse species of fish<sup>8,18–22</sup> consistently revealed a rich complement of complex spectral signals, including diverse spectral opponencies.

80

81

82

83

84

85

86

87

88

89

90

91

92

93

94

95

96

97

However, what the dominant opponencies are, and how they are built at the circuit level remains incompletely understood in any cone-tetrachromat vertebrate<sup>8</sup>. This is in part because already horizontal cells in the outer retina functionally interconnect and potentially retune cone-types<sup>9,13,23–25</sup>, thus limiting the possibility of making inferences about spectral processing based on recordings from downstream neurons. To address this, we recently measured the *in-vivo* spectral tuning of the synaptic outputs from the four cone-types in larval zebrafish using spatially widefield but spectrally narrow flashes of light<sup>26</sup>. This revealed that red-cones are non-opponent, green- and blue-cones are strongly opponent with distinct zero crossings (~523 and ~483 nm, respectively), and UV-cones are weakly opponent with a zero crossing at ~450 nm. Accordingly, in larval zebrafish already the cone-output provides up to three axes of spectral opponency<sup>8,26</sup>. However, the opponent axis provided by UV-cones was weak, which left its role in zebrafish colour vision unclear. Moreover, in view of expected extensive mixing of cone-signals in downstream circuits<sup>11,27</sup>, if and how the cones’ spectral axes are propagated downstream remains unknown.

98

99

100

101

102

103

104

Accordingly, we asked how downstream retinal circuits make use of the spectrally complex cone signals to either consolidate or to retune their spectral axes for transmission to the brain. For this, we used two-photon (2P) imaging to measure spatially widefield but spectrally highly resolved tuning functions at the level of retinal bipolar cell (BCs) presynaptic terminals in the inner retina. This strategy was previously used to establish the spectral tunings of the cones<sup>26,28</sup>, thus facilitating direct comparison.

105 We find that all three spectral axes already set-up by the cones are  
106 conserved at the level of BC presynaptic terminals, and no new axes are  
107 created. However, the “UV-red” axis was notably boosted and diversified  
108 into numerous variants of either polarity via new opponent circuits that  
109 derive from red-/green-/blue-Off-circuits connecting to UV-On-circuits. The  
110 remaining non-opponent BCs were either broadly tuned, likely built by  
111 pooling signals from all four cone types, or essentially resembled the  
112 tunings of red- and/or UV-cones in isolation. Beyond spectral tuning,  
113 bipolar cells showed a rich complement of temporal features that were  
114 absent in cones, which were notably intermixed with spectral information.

115 Taken together, larval zebrafish BC-circuits for colour vision therefore  
116 directly built upon the existing cone-tunings rather than set up  
117 fundamentally new opponencies, while at the same time adding substantial  
118 temporal complexity to the retinal code.

## 119 RESULTS

120 ***A complex interplay of spectral and temporal signals amongst BCs.***  
121 To establish *in vivo* spectral tuning functions at the level of individual  
122 presynaptic terminals of bipolar cells (BCs) in the inner retina, we imaged  
123 light-evoked calcium responses from 6-7 days post fertilisation (*dpf*)  
124 RibeyeA:SyjGCaMP7b zebrafish under two-photon (2P) using established  
125 protocols<sup>18,29,30</sup> (Methods). To record from 100s of individual BC terminals  
126 in parallel, we used a non-telecentric triplane imaging approach<sup>31</sup>  
127 (Methods). For light-stimulation, we used the same system and protocol  
128 previously employed to determine cone-tunings<sup>26</sup> (Figure 1A,B). In brief,  
129 light from 13 spectrally distinct LEDs was collected by a collimator after  
130 reflecting off a diffraction grating which served to narrow individual LED  
131 spectra reaching the eye<sup>32</sup>. From here, stimuli were presented to the fish  
132 as widefield but spectrally narrow flashes of light (3 s On, 3 s Off, starting  
133 from “red” and sweeping towards UV; Methods). One example recording  
134 from BC terminals is illustrated in Figure 1C-E alongside averaged cone-  
135 responses to the same stimulus (Figure 1B) taken from Ref<sup>26</sup>. In short,  
136 each recording plane was automatically processed to detect the  
137 boundaries of the inner plexiform layer (IPL, Figure 1D, left) and to place  
138 regions of interest (ROIs) based on pixel-wise response coherence over  
139 consecutive repeats (Figure 1D, right, Methods). From here, fluorescence  
140 traces from each ROI were extracted, detrended, z-scored, and averaged  
141 over typically 7-8 stimulus repetitions (Figure 1D,E). This revealed a great  
142 diversity in both the spectral and the temporal composition of responses  
143 amongst BCs. For example, some ROIs were entirely non-opponent but  
144 differed in their spectral tuning and in the degree to which they “overshot”  
145 the baseline between stimulus presentations (Figure 1F, compare ROIs  
146 labelled BC1 and BC2). Other ROIs such as the one labelled BC3 were  
147 spectrally opponent, here exhibiting Off-signals to mid-wavelength  
148 stimulation but On-signals to UV-stimulation. Finally, some ROIs including  
149 the one labelled BC4 exhibited different temporal responses to long- and  
150 short-wavelength stimulation.

151 We recorded responses from a total of  $n = 72$  triplane scans in  $n = 7$  fish,  
152 across four major regions of the eye: Acute Zone (AZ), Dorsal (D), Nasal  
153 (N), and Ventral (V). From here,  $n = 6,125$  ROIs ( $n_{AZ,D,N,V} = 2,535, 1,172,$   
154  $1,889, 529$ , respectively) that passed a minimum response quality criterion  
155 (Methods) were kept for further analysis.

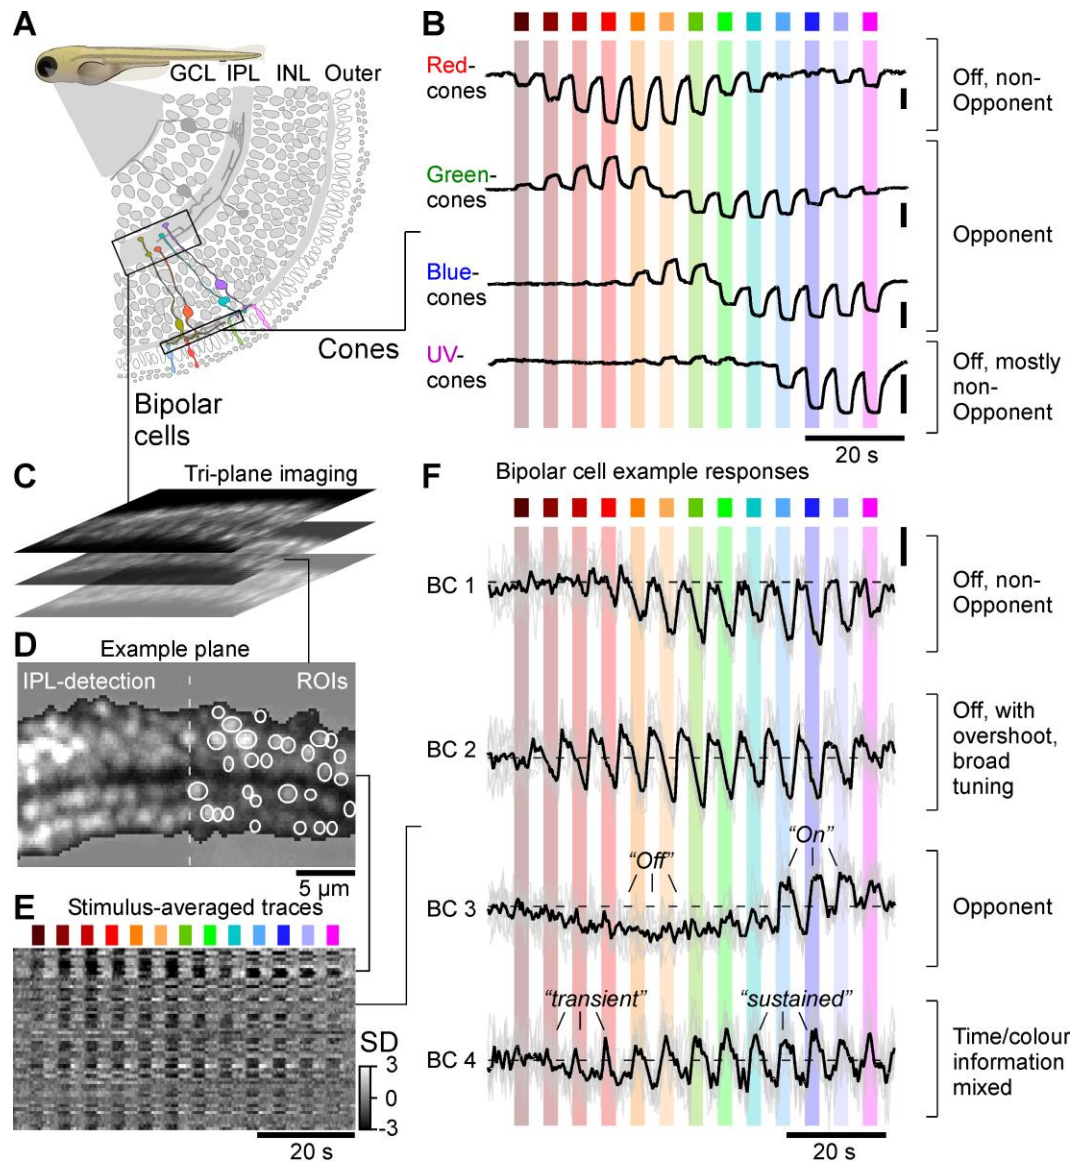

156

157 **Figure 1 | Measuring high-spectral resolution tuning curves in zebrafish bipolar cells.** **A**, Schematic of the  
 158 larval zebrafish retina, with cone-terminals in the outer retina and bipolar cell (BC-) terminals in the inner retina  
 159 highlighted. **B**, Mean calcium-responses of red- green-, blue- and UV-cone terminals to a series of 13 spectrally  
 160 distinct widefield flashes of light as indicated (data from Re<sup>26</sup>). Note that for clarity the response to a 14<sup>th</sup> “low-  
 161 power-control” UV-LED was graphically removed compared to the original publication. **C-F**, Illustration of  
 162 recording strategy for BC-terminals in the inner plexiform layer (IPL), and exemplary results. An optical tri-plane  
 163 approach (C, top) was used to simultaneously record from three planes of larval zebrafish BC-terminals  
 164 expressing SyGCaMP6f by way of two-photon imaging coupled with remote focussing (Methods). From here, we  
 165 automatically placed regions of interest (ROIs) and detected the boundaries of the IPL (D, Methods). Time traces  
 166 from all ROIs in a recording plane were z-scored and averaged across 3-5 response repeats of the full stimulus  
 167 sequence (E). Example traces from individuals ROIs (F) are shown as individual repeats (grey) and averages  
 168 across repeats (black).

169 Next, we clustered BC responses using a mixture of Gaussian model as  
 170 described previously<sup>18,21,33,34</sup> (Methods). This yielded 29 functional BC-  
 171 clusters (Figure 2A,B), here arranged by their mean stratification position in  
 172 the IPL (Figure 2C). If and how this relatively large number of functional  
 173 BC-clusters maps onto veritable BC ‘types’<sup>27</sup> remains unknown. For  
 174 comparison, previous studies described 25 functional<sup>18</sup> and 21  
 175 anatomical<sup>11</sup> BCs, however a deeper census of zebrafish BC-types, for  
 176 example based on additional data from connectomics<sup>35</sup> and/or  
 177 transcriptomics<sup>36</sup> remains outstanding.

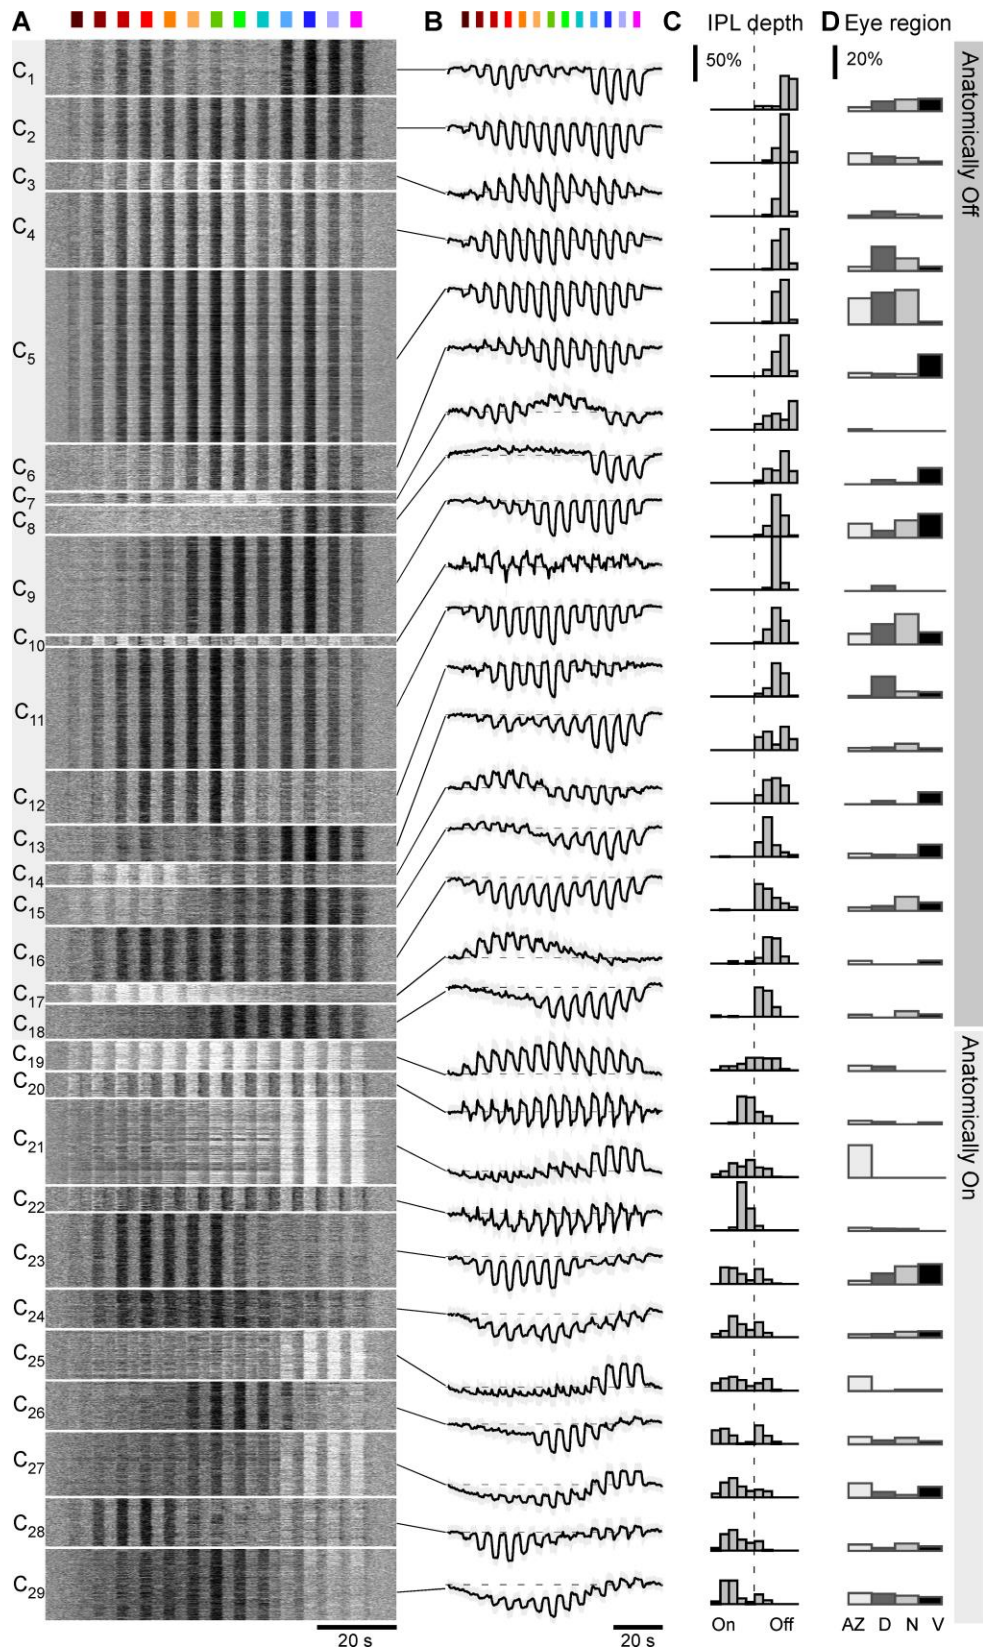

178

179 **Figure 2 | Clustering into 29 functional BC-types.** A-D, Overview of the result from unsupervised clustering of  
 180 all BC-data recorded as shown in Figure 1 that passed a minimum quality index ( $QI > 0.4$ , Methods). For each  
 181 cluster, shown are the individual BC-mean responses as heatmaps (A), the corresponding cluster means and SD  
 182 shadings, with approximate baseline indicated in dashed (B), distribution of ROI positions in the IPL (C) and each  
 183 cluster's distribution across the four recording regions within the eye (D, from left: acute zone, dorsal, nasal,  
 184 ventral). Histograms in (C) are area-normalised by cluster, and in (D) by recording region. Clusters are ordered  
 185 by their average anatomical position in the IPL, starting from the border with the inner nuclear layer (cf. C).

186 Consistent with previous work that was based on a different stimulus with  
187 lower spectral resolution<sup>18</sup>, zebrafish BC-clusters were highly diverse, and  
188 many exhibited a regional bias to one or multiple parts of the eye (**Figure**  
189 **2D**). However, with our current focus on BC-spectral tunings, we did not  
190 further analyse this eye-wide regionalisation.

191 Overall, BC-clusters differed strongly in their wavelength selectivity. For  
192 example, clusters C<sub>1</sub> and C<sub>2</sub> both hyperpolarised in response to all tested  
193 wavelengths, but C<sub>2</sub> was tuned broadly while C<sub>1</sub> exhibited a notable dip in  
194 response amplitudes at intermediate wavelengths. Other clusters exhibited  
195 clear spectral opponency. For example, clusters C<sub>26-29</sub> all switched from  
196 Off-responses to long wavelength stimulation to On-responses at shorter  
197 wavelengths. A single cluster (C<sub>7</sub>) exhibited a spectrally triphasic response.  
198 BCs also differed in their temporal responses. For example, while cluster  
199 C<sub>2</sub> consistently responded in a sustained manner, cluster C<sub>3</sub> responses  
200 were more transient and overshoot the baseline between light-flashes.  
201 Finally, diverse spectral and temporal response differences did not only  
202 exist between BC clusters, but also within. For example, cluster C<sub>6</sub>  
203 switched from transient responses during long-wavelength stimulation to  
204 sustained responses during short-wavelength stimulation. In some cases,  
205 such intermixing of spectral and temporal encoding in a single functional  
206 BC-cluster could be quite complex. For example, cluster C<sub>21</sub> switched from  
207 small transient On-Off responses via intermediate amplitude transient-  
208 sustained On-responses to large amplitude sustained-only On-responses  
209 in a wavelength-dependent manner.

210 Overall, in line with connectivity<sup>11,37</sup> and previous functional work, both the  
211 spectral<sup>18,21,22</sup> and the temporal diversity<sup>18,21,22,29,38,39</sup> of larval zebrafish BCs  
212 long exceeded that of the cones, which at the level of presynaptic calcium  
213 were generally sustained<sup>26</sup>, and which only exist in four spectral variants  
214 (cf. **Figure 1B**).

215 ***Linear cone-combinations using four temporal components can***  
216 ***account for BC responses.*** We next explored if and how these BC  
217 cluster-means (**Figure 2B**) could be explained based on cone responses<sup>26</sup>  
218 (**Figure 3**, cf. **Figure 1B**). For this, we implemented a simple linear model  
219 (Methods) based on the following considerations.

220 BCs may receive cone inputs by two main, non-mutually exclusive routes:  
221 directly, via dendritic contacts onto cone-pedicles in the outer retina, and  
222 indirectly, via lateral inputs from amacrine cells in the inner retina<sup>27</sup>. A third  
223 route, via horizontal cells, has been proposed in the case of mice<sup>40</sup>. If such  
224 a route exists in zebrafish remains unknown.

225 In the outer retina, direct cone inputs are based on BC-type specific  
226 expression of glutamate receptor and/or transporter variants that are  
227 thought to be either all-sign-conserving or all-sign-inverting, but apparently  
228 never a mixture of both<sup>27,38,41</sup>. Accordingly, dendritic inputs alone should  
229 only be able to produce spectral tuning functions in BCs that can be  
230 explained by same-sign cone inputs. Any BC that cannot be explained in  
231 this manner is then expected to require spectrally distinct inputs from  
232 amacrine cells. On the other hand, variations to the temporal structure of a  
233 given cones' contribution to a BC's response could be implemented via  
234 either route<sup>27,34,42</sup>. Accordingly, we reasoned that for a linear  
235 transformation, each cone-type may feed into a functional BC-type via a  
236 unique temporal profile that represents the sum of all routes from a given  
237 cone to a given BC. In this way, our model effectively sought to explain

238  
239

each BC-cluster as a weighted sum of four spectral cone-tunings, but each of these four cone-inputs could have a unique temporal structure.

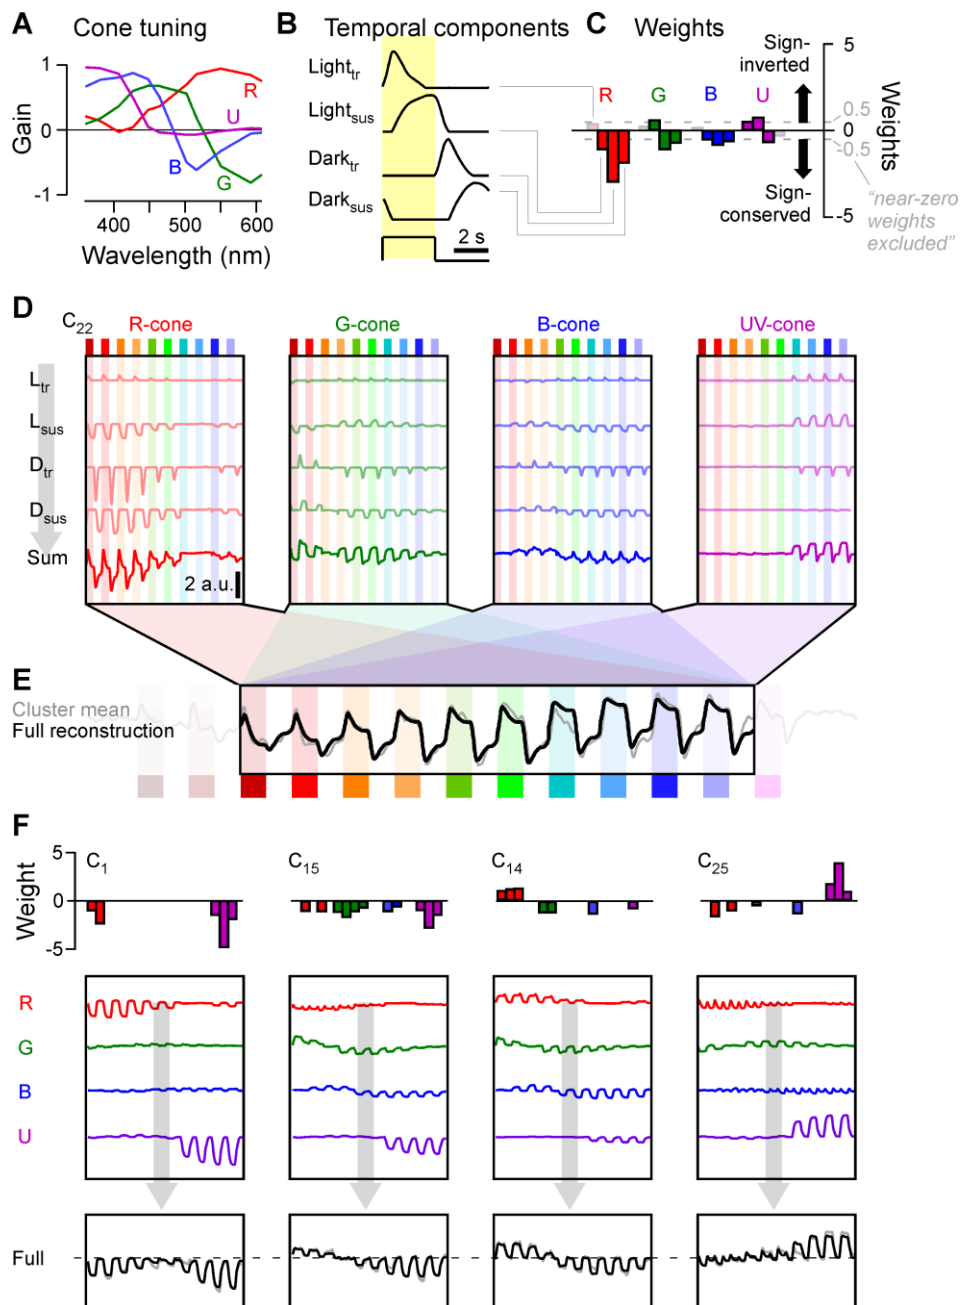

240

241 **Figure 3 | Reconstructing bipolar cell responses from cones.** A-E, Summary of the reconstruction strategy  
 242 for example cluster C<sub>22</sub> (for details see Methods). Each BC-cluster reconstruction is based on the linear  
 243 combination of the spectral tunings functions of the four cone-types (A, from Ref<sup>26</sup>) with four stereotyped  
 244 temporal components associated with individual light flashes (B), yielding 4 X 4 = 16 weights (C). Weights are  
 245 shown in blocks of temporal component weights (from left: Light-transient, Light-sustained, Dark-transient, Dark-  
 246 sustained) associated with each cone (indicated by the corresponding colours). Bars above zero indicate sign-  
 247 inverted ("On-") weights, while bars below zero indicate sign-conserved ("Off-") weights. The corresponding full  
 248 expansion of this reconstruction is shown in (D). Individual combination of each cone's tuning function (A)  
 249 with each temporal component (B), scaled by their corresponding weight (C), yields sixteen "sub-traces" (D, upper  
 250 four traces in each of the four panels, labelled L<sub>tr</sub>, L<sub>sus</sub>, D<sub>tr</sub>, D<sub>sus</sub>). Summation of each cone's four sub-traces yields  
 251 that cone's total contribution to the cluster (D, bottom traces, labelled "sum"). Finally, summation of the four cone-  
 252 totals yields the full reconstruction (E, black trace), shown superimposed on the target cluster mean (grey). F, as  
 253 A-E, but showing only the weights (top) cone-totals (middle) and full reconstructions (bottom) for another four  
 254 example clusters (from left: C<sub>1</sub>, C<sub>15</sub>, C<sub>14</sub>, C<sub>25</sub>). Further detail on reconstructions is shown in Figure S1, and all  
 255 cluster's individual results are detailed in Appendix 1.

256 To capture the above considerations in a linear model, we combined the  
257 four-cone spectral tuning functions (Figure 3A, cf. Figure 1B) with four  
258 dominant temporal components extracted from BC responses: light-  
259 transient, light-sustained, dark-transient, and dark-sustained (Figure 3B,  
260 Methods). We restricted the model to capture the central ten light-stimuli  
261 (i.e. omitting the first two red-flashes and the last UV-flash) where BC-  
262 clusters generally exhibited the greatest response diversity (Figure 2).

263 Notably in the following paragraphs, we avoid the use of the common  
264 shorthand “On” or “Off” because in view of spectral opponency already  
265 present in cones<sup>26</sup> a sign-conserving input to a BC is not categorically “Off”,  
266 and vice versa a sign-inverting input is not categorically “On”. Instead, we  
267 use the terms “light” and “dark” response, in reference to a response that  
268 occurs in the presence or absence of a light-stimulus, respectively. Also  
269 note that all extracted spectral tuning functions (e.g. Figure 3A) are x-  
270 inverted compared to the time-axes in recordings and reconstructions (e.g.  
271 Figure 3D,E). This was done because recordings were performed from  
272 long- to short wavelength stimuli, but spectral tuning functions are  
273 conventionally plotted from short- to long-wavelengths. Weights were  
274 scaled such that the mean of their magnitude equalled one, with weights  
275 <0.5 (“near-zero”) excluded from the summary plots for visual clarity. Full  
276 weights, including a detailed overview of each cluster, are available in  
277 Appendix 1.

278 Figures 3C-E illustrate the intermediate steps (Figure 3C,D) and final  
279 output (Figure 3E) of the model for example cluster C<sub>22</sub>. This functional BC-  
280 type was broadly tuned but switched from transient responses to long  
281 wavelength stimulation to more sustained responses at shorter  
282 wavelengths (Figure 3E, grey trace, cf. Figure 2A,B). To capture this  
283 behaviour (Figure 3E, black trace), the model drew on all four cones  
284 (Figure 3C), however with a particularly strong sign-conserved contribution  
285 from red-cones (Figure 3C, left). Here, the model placed a strong sign-  
286 conserving weight onto the dark-transient (D<sub>tr</sub>) component of the red-cone  
287 (Figure 3D, left, third trace). The strength and sign of this weight is  
288 illustrated in Figure 1C (third downwards facing red bar). In addition, the  
289 model also placed weaker sign-conserving weights onto the dark-sustained  
290 (Figure 3D, left, fourth trace) and light-sustained (second trace)  
291 components, and a weak sign-inverted weight onto the dark-transient  
292 component (first trace). Summation of these four kinetic components  
293 yielded the total modelled red-cone contribution to this cluster (Figure 3D,  
294 bottom trace).

295 The same principle was applied across the remaining three cones, yielding  
296 a total of sixteen (four cones times four temporal components) weights per  
297 cluster (cf. Figure 3C). In the example presented, weights were mostly  
298 sign-conserving (facing downwards). However, to capture the relatively  
299 complex temporal dynamics of this cluster, which systematically overshot  
300 the baseline between flashes, the model also drew on a number of weaker  
301 sign-inverted weights (facing upwards), for example for all light-transient  
302 components.

303 Figure 3F illustrates outputs of the model for another four example clusters  
304 with diverse spectral and temporal behaviours. Of these, the spectrally  
305 bimodal but “temporally simple” response profile of C<sub>1</sub> was well-  
306 approximated by all sign-conserving inputs from red- and UV-cones (Figure  
307 3F, left). Similarly, the spectrally opponent behaviour of C<sub>15</sub> could be



308  
309  
310  
311  
312  
313  
314  
315  
316  
317  
318  
319  
320

captured by all-sign-conserving inputs from all four cones (Figure 3F, second panel). Accordingly, as expected from the cone-tunings, generating opponent responses at the level of BC terminals does not categorically require new sign-opposition in the inner retina – instead, the opponency can simply be inherited from the cones. Nevertheless, not all opponent BC responses could be explained in this manner. For example, opponent cluster  $C_{14}$  required sign-inverted inputs from red-cones but sign-conserving inputs from green-, blue- and UV-cones (Figure 3F, third panel). Finally, even the more complex spectral and temporal BC-clusters could be well-approximated by relatively simple cone-mixtures. For example,  $C_{25}$  was captured by combining sign-conserved light- and dark-transient inputs from red- and blue-cones with mostly sustained and sign-inverted inputs from UV-cones (Figure 3F, rightmost).

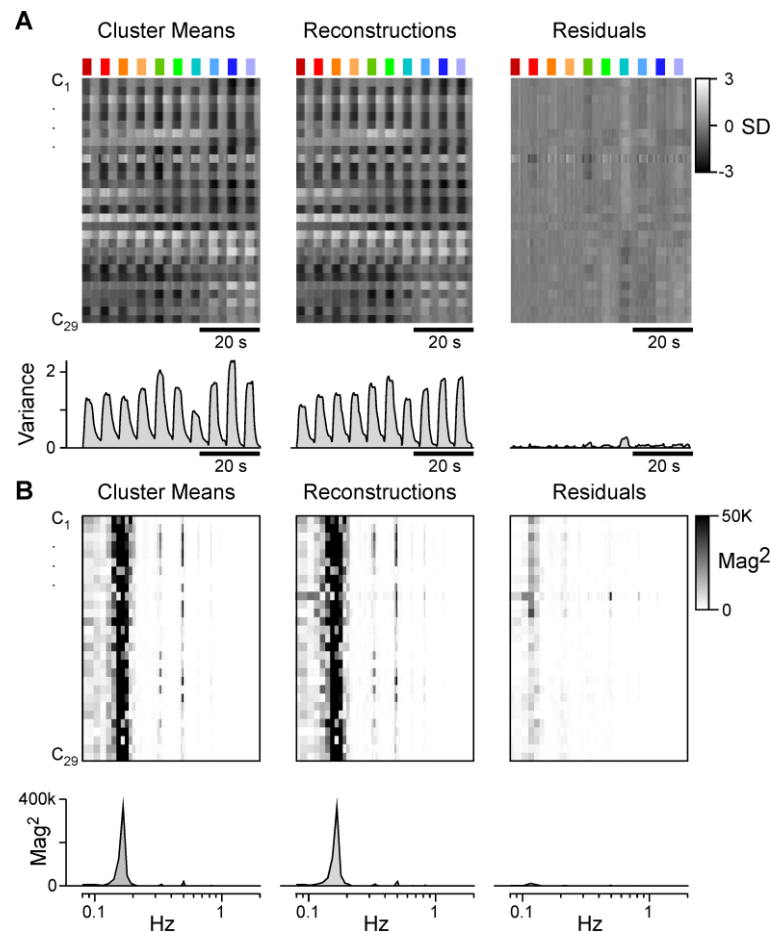

321

322 **Figure S1 – related to Figure 3 | Cluster reconstruction details.** **A**, Time-aligned heatmaps of all cluster  
323 means (left) are shown alongside their corresponding reconstructions (middle) and residuals (right). The time  
324 trace below each cluster shows the total variance across all clusters per time point (Methods). **B**, as A, but for  
325 magnitude-squared Fourier transforms of each cluster, reconstruction, and residuals. The traces below each  
326 panel show the averages of these transforms across all clusters (Methods). Note that for both (A) and (B),  
327 residuals retain only a small fraction of the original signal, indicating high reconstruction fidelity. Reconstruction  
328 quality of each individual cluster can further be assessed in Appendix 1.

329 **Figure 4 – A functional overview of cone-bipolar cell mappings.** **A,B**, Overview of all BC-cluster means (A,  
330 grey traces, cf. Figure 2B) and their full reconstructions based on the strategy detailed in Figure 3 (black traces).  
331 Associated weights are shown in (B). For clarity, “near-zero” weights ( $\text{abs}(w) < 0.5$ ) are omitted. Full weights are  
332 shown in Appendix 1. Note that based on outer retinal inputs only, weights are generally expected to be sign-  
333 conserving for clusters in the traditional “Off” layer ( $C_1$ - $C_{18}$ ), and sign-inverting in the anatomical “On” layer ( $C_{19}$ -  
334  $C_{29}$ ), as indicated on the right. The round symbols plotted next to each cluster (A) denote their allocated spectral  
335 group, as detailed in Figure 6 and associated text.

336

Figure 4 overleaf →

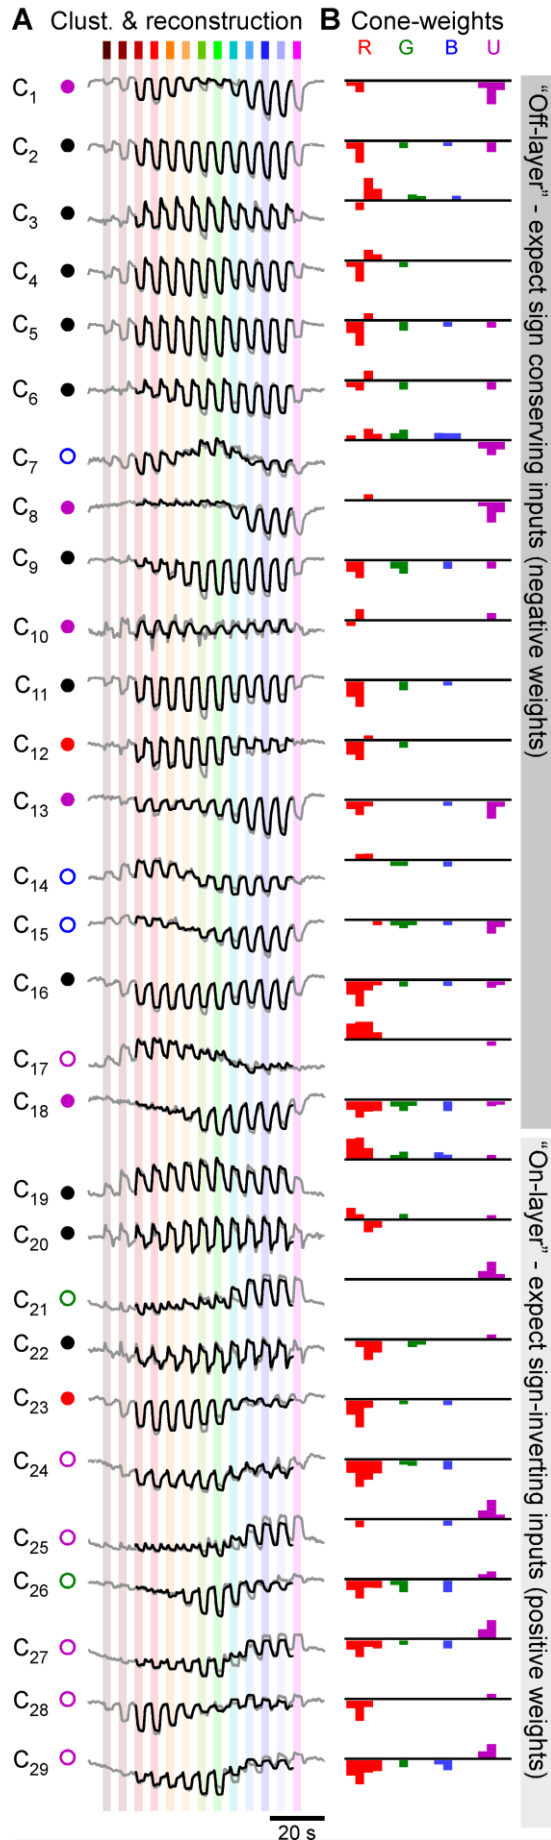

338 Overall, this linear fitting procedure captured ~95% of the total variance  
 339 across the 29 cluster means (Figure S1A, Methods). Similarly, the fits also  
 340 captured ~95% of the temporal detail, based on comparison of the mean  
 341 power spectra of the cluster means and that of the residuals (Figure S1B,  
 342 Methods). The full result of this process is summarised in Figure 4, each  
 343 time showing the cluster mean (grey) and reconstruction (black) alongside  
 344 weight-summaries per cone following the schema illustrated in Figure  
 345 3B,C. Further detail is shown in Appendix 1.

346 Based on the traditional separation of the inner retina into “Off-” and “On-  
 347 layers”<sup>27</sup>, we may correspondingly expect mainly sign-conserving  
 348 (negative) weights in “Off-stratifying” clusters C<sub>1</sub>-C<sub>18</sub>, and mainly sign-  
 349 inverting (positive) weights for “On-stratifying” clusters C<sub>19</sub>-C<sub>29</sub>. However,  
 350 this expectation was not met in several cases, for example for most of the  
 351 On-stratifying clusters which nevertheless showed a general abundance of  
 352 negative (“Off”) weights for red-, green- and blue-cone inputs. From here,  
 353 we next explored the general rules that govern overall cone-signal  
 354 integration by BCs.

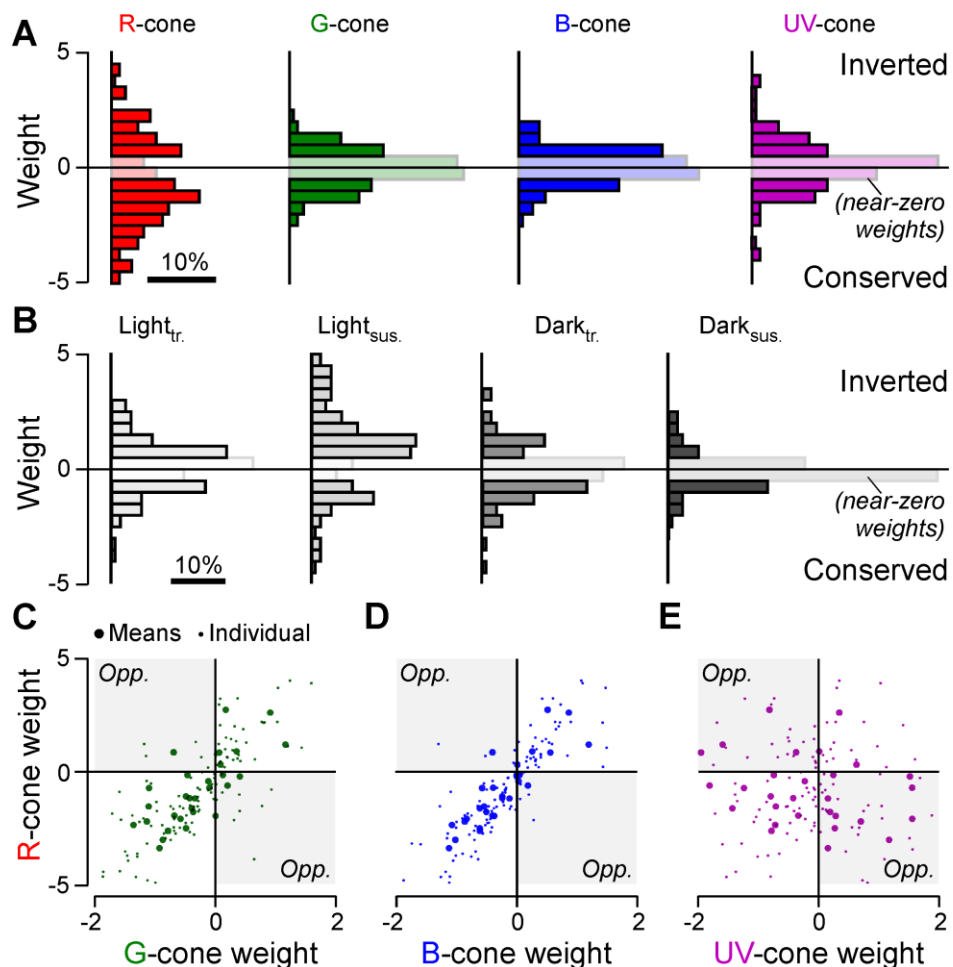

355 **Figure 5 – Major trends in the distribution of cone-weights.** A,B, Histograms of all weights associated with  
 356 inputs to each of the four cones across all clusters, independent of temporal-component types (A), and  
 357 correspondingly histograms of all weights associated with temporal components, independent of cone-type (B).  
 358 “Near-zero” weights ( $abs(w) < 0.5$ ) are graphically de-emphasised for clarity. All weights contributed equally to  
 359 these histograms, independent of the size of their corresponding cluster. C-E, Scatterplots of all clusters’ weights  
 360 associated with each cone plotted against each other as indicated. Large symbols denote the mean weight  
 361 associated with each cone and cluster across all four temporal components (i.e. one symbol per cluster), while  
 362 small symbols denote each weight individually (i.e. four symbols per cluster, corresponding to L<sub>tr</sub>, L<sub>sus</sub>, D<sub>tr</sub>, D<sub>sus</sub>).  
 363 The remaining three possible cone-correspondences (G:B, G:U, B:U) are shown in Figure S2.  
 364

365 **The inner retina is dominated by red-cone inputs.** First, we computed  
366 histograms of all weights per cone (Figure 5A) and per temporal  
367 component (Figure 5B) to determine the dominant input-motifs across the  
368 population of all BCs. This revealed that overall, the amplitudes of red-  
369 cone weights tended to be larger than those of all other cones (red  
370 absolute weights  $W_R = 1.82 \pm 1.22$ ;  $W_{G,B,U} = 0.68 \pm 0.47$ ,  $0.62 \pm 0.45$ ,  
371  $0.87 \pm 0.88$ , respectively, range in SD;  $p < 0.001$  for all red-combinations,  
372 Wilcoxon Rank Sum Test). Similarly, light-response component weights  
373 tended to be larger than dark-response component weights ( $W_{LT, LS, DT, DS} =$   
374  $0.94 \pm 0.75$ ,  $1.73 \pm 1.20$ ,  $0.85 \pm 0.8$ ,  $0.48 \pm 0.54$ , respectively Figure 5B). Here,  
375 the light-sustained response components that already dominate the cones  
376 (cf. Figure 1B) remained largest overall also in BCs ( $p < 0.001$  for all  
377 Light<sub>sus</sub>-combinations, Wilcoxon Rank Sum Test).

378 **Red-, green- and blue-cone weights co-vary independent of UV-cone**  
379 **weights.** Next, we explored the weight relationships between the four cone  
380 types across clusters. In general, a strong correlation between weights  
381 attributed to any two cone types would suggest that inputs from these  
382 cones tend to be pooled, for example by the dendrites of individual BCs  
383 contacting both cone-types. In contrast, a low correlation or even  
384 anticorrelation between cone-weights could indicate the presence of cone-  
385 opponency.

386 Across clusters, we found that red-cone weights strongly correlated the  
387 weights of both green- ( $\rho = 0.73$ ; 95% confidence intervals (CI) 0.49/0.86,  
388 Figure 5C) and blue-cones ( $\rho = 0.87$ , CI 0.74/0.94, Figure 5D; green vs.  
389 blue:  $\rho = 0.89$ ; CI 0.77/0.95, cf. Figure S2A). The tight association between  
390 red-, green- and blue-cone weights extended across both the all-sign  
391 inverting (bottom left) and the all-sign-conserving (top right) quadrants and  
392 comprised few exceptions in the two remaining quadrants that would  
393 indicate cone-opponency. Accordingly, zebrafish BCs did not tend to  
394 differentially combine inputs from red-, green- or blue-cones of either  
395 polarity to set up potentially new opponent-axes.

396 In contrast, red-cone weights were uncorrelated with UV-cone weights ( $\rho =$   
397  $-0.21$ , CI  $-0.55/0.14$ , Figure 5E, green sc. UV:  $\rho = -0.04$ , CI  $-0.40/0.34$ ; blue  
398 vs. UV;  $\rho = -0.34$ , CI  $-0.63/0.03$ , see Figure S2B,C), with many clusters  
399 scattering across the two sign-opponent quadrants (i.e. top left, bottom  
400 right). Accordingly, reconstructing a substantial fraction of BC clusters  
401 required opposite sign inputs from red-/green/blue- versus UV-cones,  
402 suggestive of a newly set-up form of spectral opponency in the inner retina.  
403 Accordingly, we next explored the spectral tuning of BC-clusters in further  
404 detail.

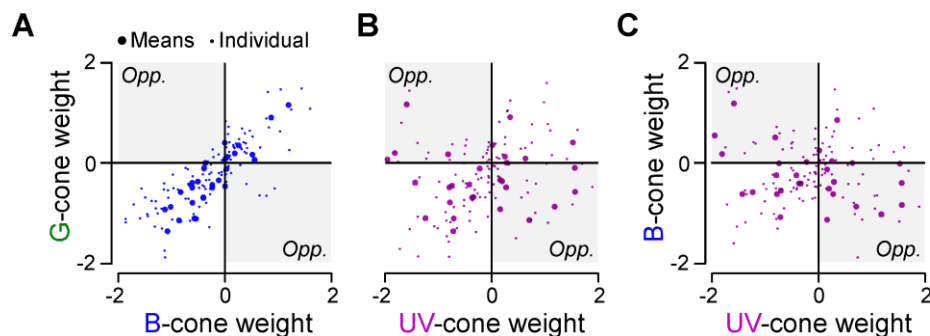

405  
406 **Figure S2 – related to Figure 5 | Additional cone-weight relationships.** A-C, As Figure 5C-E, but showing  
407 weight correspondences between green-blue, green-UV and blue-UV cones, respectively.

408  
409  
410  
411  
412  
413  
414  
415  
416  
417  
418  
419  
420  
421  
422  
423

**BC spectral responses fall into three opponent, and three non-opponent groups.** The complex interplay of temporal and spectral structure in BC-responses (Figure 2) meant that their spectral tuning functions could not easily be extracted directly from the BC-cluster means, for example by means of taking the area under the curve in response to each flash of light. Instead, we estimated their tuning functions based on their fitted cone-weights (cf. Figure 4). To this end, for each cluster we summed sixteen cone-tuning functions (based on Figure 3A), each scaled by the cluster's associated sixteen weights (i.e. red-L<sub>tr</sub> + red-L<sub>sus</sub> + red-D<sub>tr</sub>, and so on). This summarised each cluster's 'bulk' response in a single spectral tuning function that gave equal weight to each of the four temporal components (Figure 6A-F). By this measure, 18 of the 29 BC-clusters were non-opponent (62%, Figure 6A-C) and 11 were opponent (38%, Figure 6D-F). Here, opponency was defined as any tuning function that crossed and overshot zero at least once with an amplitude of at least 10% compared to that of the opposite (dominant) polarity peak response.

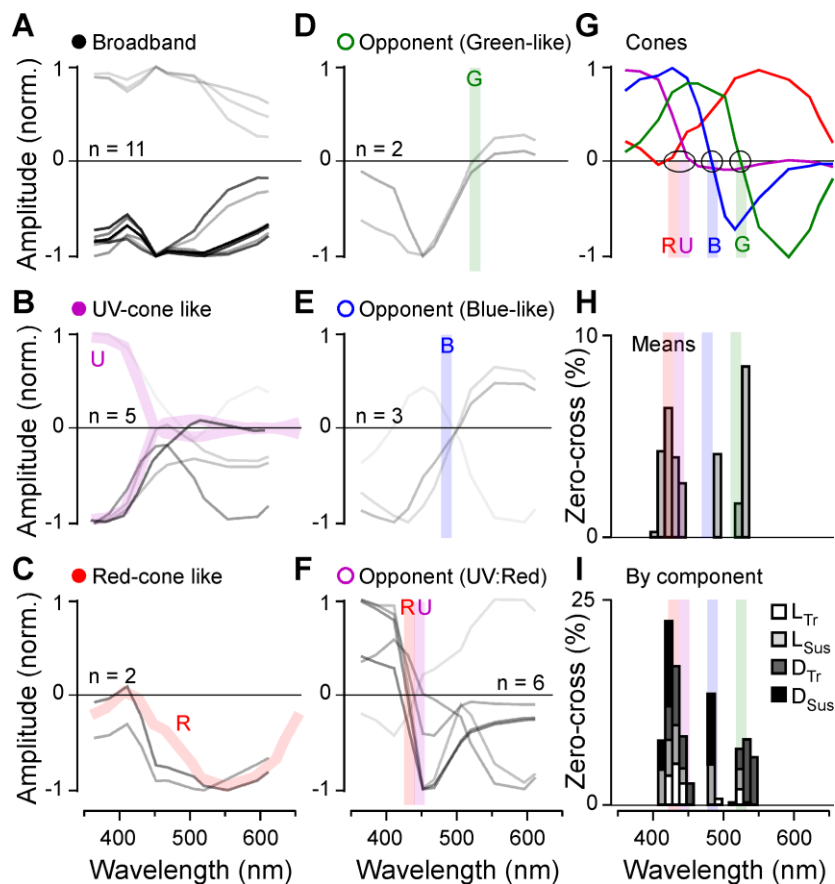

424

**Figure 6 – Spectral tuning of functional BC-types.** A-F, Peak-normalised 'bulk' spectral tuning functions of all 29 clusters, grouped into six categories as indicated. The strength of each line indicates the numerical abundance of ROIs belonging to each cluster (darker shading = larger number of ROIs; exact number of ROIs contributing to each cluster are listed in Appendix 1). As appropriate, spectral tuning functions of cones (cf. G) are shaded into the background, as appropriate (B,C, thick coloured traces) to illustrate the close spectral correspondences of associated cones and BCs. Similarly, for three spectrally opponent groups (D-E), the approximate positions of the corresponding cone's zero crossings are indicated with a vertical shaded line (cf. G). G, Cones' spectral tuning functions, with approximate zero-crossings (blue-/green-cones) and zero-positions (red-/UV-cones) graphically indicated. H, I, Histograms of zero-crossings across all BC-clusters, incorporating the abundance of ROIs belonging to each cluster. Shown are crossings of 'bulk' spectral tunings functions (H, cf. A-F), and of spectral tuning functions that were computed each temporal component individually, as indicated (see also Figure S3C-E, and Appendix 1). Note the three prominent peaks of zero-crossing positions, approximately aligned with the zero-positions/crossings of the cones. These peaks largely disappeared when time-components were permuted at random across cones (Figure S3A,B).

439 Non-opponent clusters ('closed' symbols, cf. Figure 4A) approximately  
440 adhered to three major groups: spectrally broad (three On- and eight Off-  
441 clusters, Figure 6A), approximately UV-cone-like (one On- and four Off-  
442 clusters, Figure 6B), and approximately red-cone-like (two Off-clusters,  
443 Figure 6C). For simplicity, non-opponent clusters that combined both red-  
444 and UV inputs (e.g. C<sub>1</sub>) were included in the UV-group (Figure 6B),  
445 because UV-input was generally dominant over red in these cases.

446 Next, like non-opponent clusters, also opponent clusters ('open' symbols)  
447 fell into three major groups based on the spectral positions of their zero  
448 crossings: Two green-cone-like clusters (both short<sub>Off</sub>/long<sub>On</sub>, crossing at  
449 520 and 536 nm, Figure 6D), three blue-cone-like clusters (two  
450 short<sub>Off</sub>/long<sub>On</sub> crossing at 497 and 499 nm, plus the single triphasic C<sub>7</sub> with  
451 a dominant short<sub>On</sub>/long<sub>Off</sub> zero crossing at 490 nm, Figure 6E), and six UV-  
452 cone versus red-/green-/blue-cone opponent clusters (henceforth:  
453 UV:R/G/B, five short<sub>On</sub>/long<sub>Off</sub>., crossing at 416, 425, 428, 435, 448 nm, one  
454 short<sub>Off</sub>/long<sub>On</sub> crossing at 438 nm, Figure 6F). In comparison, green- and  
455 blue-cone zero-crossings, respectively (Figure 6G, from Ref<sup>26</sup>) occurred at  
456 ~523 and ~483 nm, while red- and UV-cones, respectively, approached  
457 zero between ~425 and 450 nm (Figure 6D-I, shadings).

458 The tight correspondence between opponent BC-clusters (Figure 6D-F)  
459 and cone-tunings (Figure 6G) was further illustrated by the histogram of  
460 BC-zero-crossings that also incorporated relative abundances of ROIs  
461 contributing to each cluster (Figure 6H). The histogram showed three clear  
462 peaks that were well-aligned to the three spectral axes set-up in the cones  
463 (shadings). Further, the histogram also retained its overall shape when the  
464 four temporal components underpinning each cluster were considered  
465 individually (Figure 6I). As a control, this trimodal structure largely  
466 disappeared when temporal-components were randomly shuffled between  
467 cones (Figure S3A,B), suggesting that the measured BC tunings emerged  
468 from non-random effective cone-inputs. In support, and despite  
469 appreciable diversity, the spectral tuning functions of the four temporal  
470 components that contributed to a given cluster tended to be positively  
471 correlated among both opponent and non-opponent clusters (Figure S3C-  
472 F).

473 Remarkably therefore, it appears that by and large, BCs tended to retain  
474 many of the dominant spectral properties of the cones rather than build  
475 fundamentally new spectral axes – all despite integrating across multiple  
476 cone types and presumably diverse inputs from spectrally complex ACs<sup>22</sup>.  
477 The only two notable deviations from this observation were a highly  
478 stereotypical spectral broadening in 11 clusters (Figure 6A), which may be  
479 linked to outer retinal cone-pooling<sup>11</sup>, and, strikingly, the emergence of six  
480 strongly UV:R/G/B opponent clusters (Figure 6F).

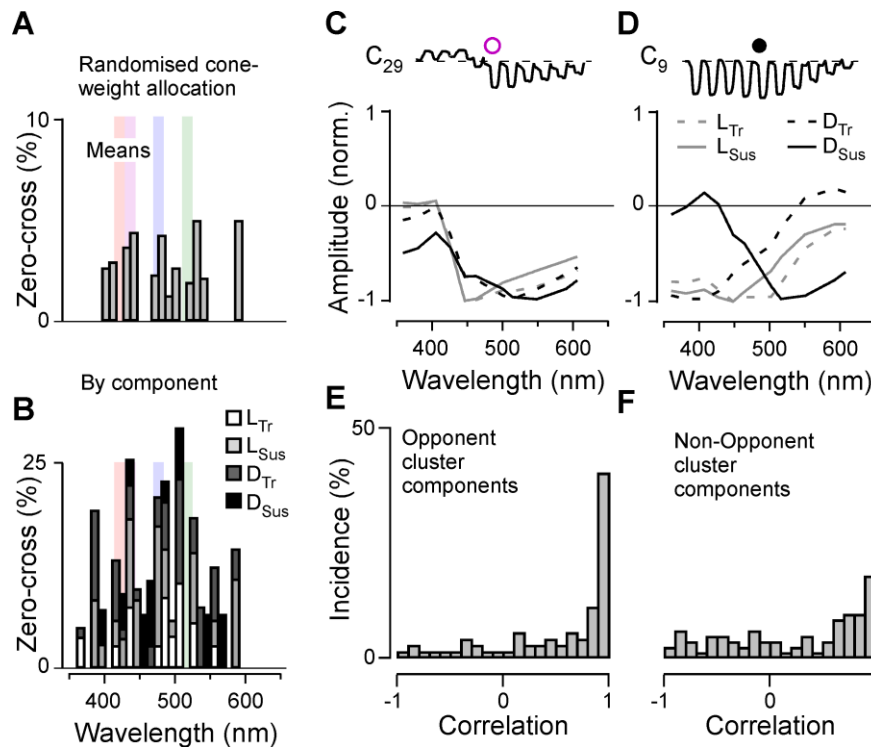

481

482 **Figure S3 – related to Figure 5 | Spectral tunings and temporal components.** A-B, As Figure 6H,I, but  
 483 following random permutation of time-components across cones. C, D, Spectral tuning functions for two example  
 484 clusters (C<sub>29</sub> and C<sub>9</sub>, respectively), computed individually by temporal components as indicated. Note that for C<sub>29</sub>  
 485 (C), the four tuning functions were similar to each other, while for C<sub>9</sub>, the tuning of the dark-sustained component  
 486 deviated strongly from that of the remaining three components. Corresponding time-component resolved tuning  
 487 functions are detailed for each cluster in Appendix 1. E,F, Distribution of correlations between each cluster's  
 488 "time-component spectral tuning functions" as illustrated in (C,D), for spectrally opponent clusters (E), and for  
 489 non-opponent clusters (F).

490

491 **UV-cone, but not red-/green-/blue-cone weights follow traditional IPL**  
 492 **On-Off lamination.** Finally, we asked where the inferred new form of UV:R/G/B  
 493 opponency might be set-up in the inner retina (Figure 7). To this end, we combined the cone-weight data (Figure 4)  
 494 with information about each BC-terminal's stratification depth within the inner plexiform layer (IPL)  
 495 (Figure 3C). In general, the IPL of all vertebrates studied to date is dominated by "Off-circuits" in the upper strata,  
 496 adjacent to the somata of BCs and most amacrine cells, and by "On-circuits" in the lower strata,  
 497 adjacent to the somata of retinal ganglion cells<sup>27</sup>. Accordingly, light-components L<sub>tr</sub> and L<sub>sus</sub> are expected to  
 498 mostly exhibit sign-conserving weights in the upper strata, and mostly sign-inverting weights in the lower  
 499 strata (Figure 7A). Dark components D<sub>tr</sub> and D<sub>sus</sub> are expected to exhibit the reverse distribution (Figure 7B).  
 502

503

504 This textbook expectation, here graphically indicated by dashed lines, was indeed approximately met when considering dark-components (Figure 7B -  
 505 note that UV-dark component weights were generally small and not further considered) and for light-components of UV-cones (Figure 7A, bottom  
 506 panel). Similarly, this classical IPL organisation was also met by red-, green- and blue-cone weights for the upper two-thirds of the IPL, which  
 507 included the traditional Off-layer, and the upper part of the traditional On-layer (Figure 7A, top three panels). However, specifically for red-, green-  
 508 and blue-cones, the lower third of the traditional On-layer was dominated by weights of the "wrong" polarity (Figure 7A, top three panels). In  
 509 agreement, most UV:R/G/B opponent clusters stratified in this lower third of  
 510  
 511  
 512  
 513

514  
515  
516

the IPL (Figures 3C,4). Together, this suggests that several of these UV:R/G/B clusters are derived from sign-reversed red-/green-/blue-cone inputs onto “native” UV-On BCs, for example by way of amacrine cells.

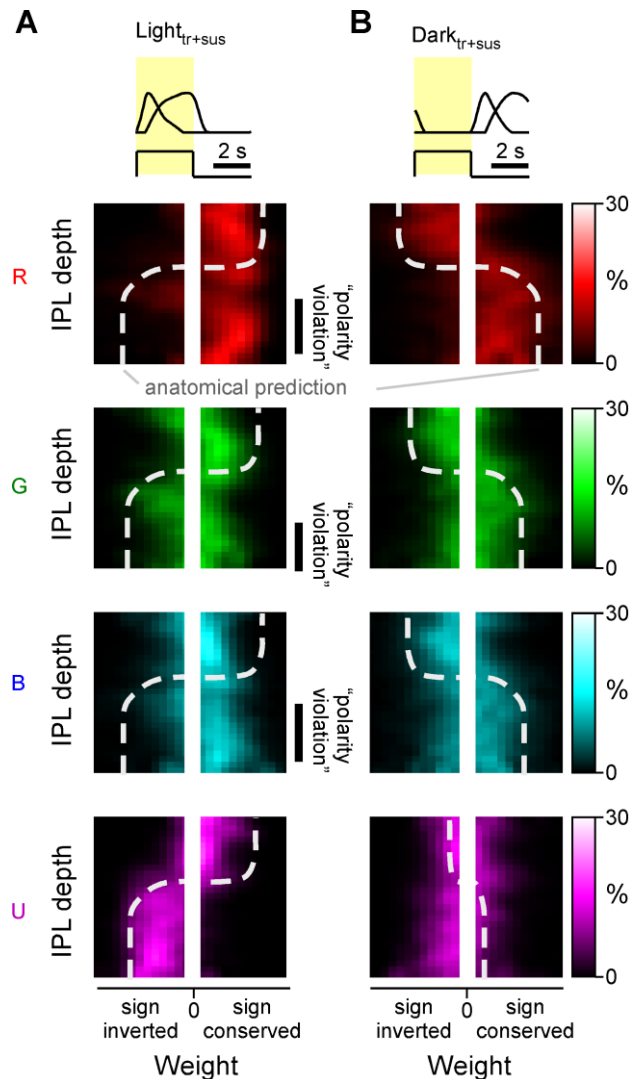

517

518 **Figure 7 – Cone-weight distribution across the inner plexiform layer.** A,B, Two-dimensional histograms of  
519 weights (x-axes) associated with each cone resolved by IPL position (y-axes). Brighter colours denote increased  
520 abundance. For simplicity, the weights associated with the light ( $L_{tr}$ ,  $L_{sus}$ ) and dark-components ( $D_{tr}$ ,  $D_{sus}$ ), are  
521 combined in panels A and B, respectively. Moreover, near-zero weights are not shown (central white bar in all  
522 panels). The thick dotted lines indicate approximate expected distribution of weights based on traditional  
523 “On-Off” lamination of the inner retina. By each panel’s side, instances where this expectation is violated are  
524 highlighted as “polarity violation”.

525

## DISCUSSION

526

527

528

529

530

531

532

533

534

535

536

We have shown that the substantial spectral and temporal diversity of larval zebrafish BCs (Figures 1,2, cf. Refs<sup>18,29</sup>) can be well-captured by a linear combination of inputs from the four spectral cone-types (Figure 3,4). This in turn allowed us to explore the major functional connectivity rules that govern spectral and temporal widefield signal integration by BCs: We find that red-cones overall provide the dominant input to BCs, often complemented by weaker but same-sign inputs from green- and blue-cones (Figure 5A,C,D). Likely as one consequence, BC pathways do not generally set-up new axes of spectral opponency in the mid- to long-wavelength range. Rather, they mostly either conserve and diversify the two major opponent axes already present in the cones (Figure 6D,E) or



537 establish non-opponent circuits (Figure 6A-C). In contrast, inner retinal UV-  
538 cone pathways appear to be organised essentially independently to those  
539 of red-, green- and blue-cones (Figure 5E). This leads to the consolidation  
540 of a third axis of spectral opponency, contrasting long- and mid-wavelength  
541 signals against UV (Figure 6F). This third axis appears to mainly stem from  
542 a systematic polarity reversal of inputs from red-, green- and blue-cones  
543 onto 'natively-UV-On' BCs in the lower IPL (Figure 7A).

544 **Building spectrally opponent BCs.** Because spectral opponency is a  
545 prominent feature in larval zebrafish cones<sup>26</sup>, BCs may inherit this property  
546 rather than set-up new opponent spectral axes by way of ACs. Indeed, the  
547 opponency observed in BC cluster C<sub>15</sub> could be explained based on  
548 weighted but all-sign-conserving inputs from all four cones (Figure 4).  
549 However, the full picture may be more complex. For example, like C<sub>15</sub>,  
550 cluster C<sub>14</sub> was also opponent, albeit with a stronger long-wavelength  
551 response, and in this case the model used weakly sign-inverted red-cone  
552 weights alongside sign-conserved green- and blue-cone weights. In fact,  
553 most UV:R/G/B opponent clusters (e.g. C<sub>25-29</sub>) required opposition of long  
554 versus short-wavelength cone inputs in the inner retina. This hints that  
555 inner retinal circuits may generally use a "mix-and-match" strategy to  
556 achieve diverse spectral responses by any available route, rather than  
557 strictly adhering to any one strategy. This notion is also tentatively  
558 supported by the presence of spectrally diverse amacrine cell circuits in  
559 adult zebrafish<sup>22</sup>. More generally, it perhaps remains puzzling how the  
560 complex interplay of cone pooling in the outer retina with AC inputs in the  
561 inner retina, across 29 highly diverse functional-BC-types which  
562 presumably express diverse receptors and ion channels<sup>27</sup>, can ultimately  
563 be summarised in an functional wiring logic that for the most part simply  
564 sums all four cones, or 'at best' opposes a red-/green-/blue-system against  
565 UV. Resolving this conceptual conflict will likely require targeted circuit  
566 manipulations, for example by comparing BC spectral tunings in the  
567 presence and absence of amacrine cell inputs, or after targeted cone-type  
568 ablations.

569 Beyond 'classical' opponency, several clusters – both opponent and non-  
570 opponent – in addition encoded a notable mixture of spectral and temporal  
571 information. Interestingly, several of these clusters appeared to be  
572 concentrated around the centre of the IPL (e.g. C<sub>20-25</sub>, Figure 2B,C) – a  
573 region which also in mammals has been associated with both transient and  
574 sustained processing<sup>34,43-45</sup>. In zebrafish, a mixed time-colour code was  
575 previously described for the downstream retinal ganglion cells<sup>21</sup>, which now  
576 raises the question to what extent ganglion cells may inherit this property  
577 from BCs. Moreover, if and how such information can be differentially read  
578 out by downstream circuits and used to inform behaviour remains  
579 unknown.

580 **Three axes of spectral opponency.** In principle, the four spectral cone  
581 types of larval zebrafish could be functionally wired to for tetrachromatic  
582 vision. This would require that all four cone types contribute independently  
583 to colour vision. Theory predicts that efficient coding of colour should be  
584 based on four channels, an achromatic channel with no zero-crossings on  
585 the spectral axis, and three chromatic opponent channels with one, two  
586 and three zero-crossings respectively<sup>5,46</sup>. However, such a coding strategy  
587 is not essential as demonstrated by the trichromatic visual system of many  
588 old-world monkeys which is based on two axes of opponency ("blue-  
589 yellow" and "red-green"), each with a single zero crossing. In the present

590 study, we find that among zebrafish BCs, three zero-crossings  
591 predominate (Figure 6H,I). Here, the single BC cluster with two zero-  
592 crossings ( $C_7$ ) did not set-up any notable additional spectral crossings  
593 either, but instead crossed once in the 'blue-cone position', and once again  
594 near the 'UV-red opponent position' (Figure 6E). Nevertheless, our findings  
595 support the notion that at least at the level of BCs, and under the stimulus  
596 conditions used in this study, the zebrafish visual system is capable of  
597 supporting tetrachromatic colour vision, as observed behaviourally in  
598 goldfish<sup>47</sup>. If and how the larval zebrafish BCs' axes are preserved,  
599 diversified, or even lost in downstream circuits will be important to explore  
600 in the future. In this regard, both retinal ganglion cells<sup>20,21</sup> and brain  
601 circuits<sup>20,48</sup> do carry diverse spectral signals, however beyond a global  
602 overview<sup>28</sup> the nature and distribution of their spectral zero-crossings  
603 remain largely unexplored.

604 **Links with mammalian SWS1:LWS opponency.** Of the three spectral  
605 axes that dominate the zebrafish inner retina (Figure 6, 8A), those  
606 functionally linked with green- (RH2) and blue-cone (SWS2) circuits are  
607 unlikely to have a direct counterpart in mammals where these cones-type  
608 are lost<sup>1,8</sup>. However, the third axis, formed by functional opposition of UV-  
609 cone circuits against red-/green-/blue-cone circuits, may relate to one or  
610 multiple of the well-studied mammalian SWS1:LWS opponent circuits<sup>49,50</sup>  
611 (Figure 8B,C).

612 Despite substantial spectral variation amongst both SWS1 and LWS cone-  
613 types across species, mammals usually oppose the signals from SWS1-  
614 cones with those of LWS-cones at a retinal circuit level<sup>4,6,51-55</sup>. For  
615 example, in the primate outer retina, SWS1-cones exhibit horizontal-cell  
616 mediated spectral opponency to LWS signals<sup>56</sup>. Likewise, in the inner  
617 retina signals from a highly conserved SWS1-exclusive On-BCs are  
618 combined with those of LWS-biased Off-circuits in most if not all mammals  
619 that have been studied at this level<sup>35,50,57,58</sup>. Further such circuit motifs can  
620 involve diverse but specific types of amacrine and/or retinal ganglion  
621 cells<sup>4,53,59</sup>.

622 Several of these mammalian motifs may have a direct counterpart in  
623 zebrafish. For example, like primate SWS1-cones, also zebrafish SWS1-  
624 cones exhibit weak but significant long-wavelength opponency that is  
625 mediated by horizontal cells<sup>26</sup>. Beyond this possible outer retinal  
626 connection, the inferred UV:R/G/B organisation in zebrafish BCs (Figures  
627 5E, 6F, 7) is reminiscent of mammalian circuits associated with SWS1-  
628 BCs.

629 First, as in most mammals<sup>51</sup>, SWS1<sub>On</sub>:LWS<sub>Off</sub> signals numerically dominate  
630 in zebrafish compared to SWS1<sub>Off</sub>:LWS<sub>On</sub> signals. Second, zebrafish  
631 SWS1:LWS opponent signals are predominately found in the lower-most  
632 (GCL-adjacent) fraction of the IPL (Figures 3, 7), the same place where  
633 mammalian SWS1-On BCs stratify<sup>35</sup>. Third, many zebrafish  
634 SWS1<sub>On</sub>:LWS<sub>Off</sub> signals occurred ventro-temporally (Figure 3D), the retinal  
635 region which in mice exhibits the highest density of type-9 BCs<sup>60</sup>, their only  
636 SWS1-exclusive BC type<sup>35,57</sup>. While zebrafish are not known to possess an  
637 SWS1-exclusive BC<sup>11</sup>, they do possess several anatomical BC types that  
638 contact SWS1-cones alongside either one or both of SWS2- (blue) and  
639 RH2-cones (green)<sup>8,11</sup>. Such BCs may conceivably become SWS1-  
640 exclusive types upon the loss of RH2 and SWS2 cones in early  
641 mammalian ancestors.

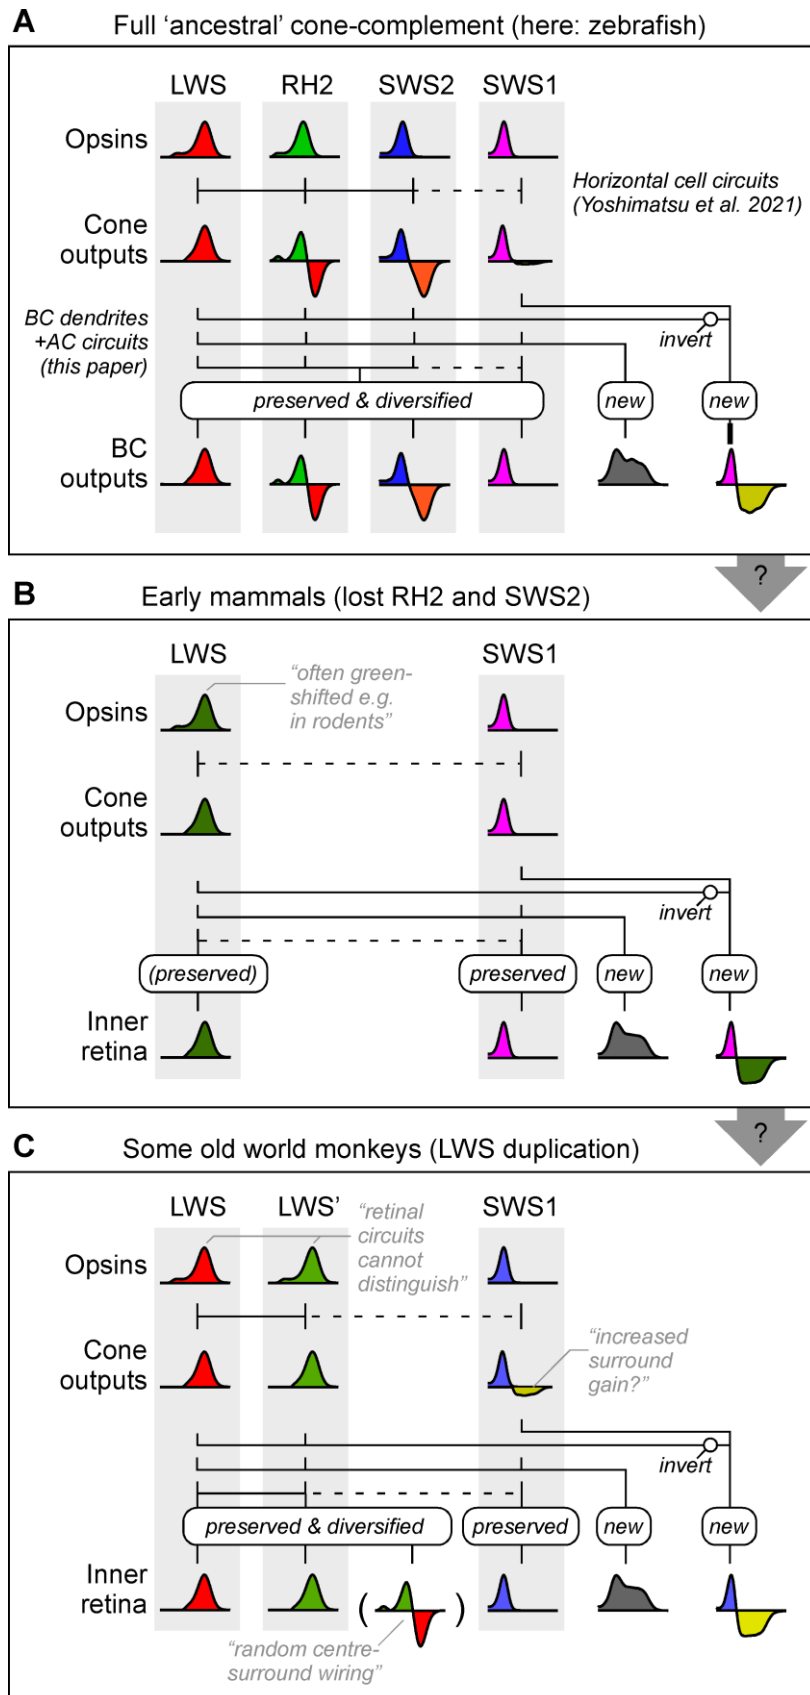

642

643 **Figure 8 – Possible links across vertebrate retinal colour circuits.** A-C, Conceptual summary schematics of  
 644 retinal circuits for colour vision in zebrafish (A), dichromatic mammals such as many rodents (B) and  
 645 trichromatic old-world monkeys such as humans (C). The coloured 'graphs' indicate approximate spectral tuning  
 646 functions of retinal neurons in a given layer, as indicated.

647 However, not everything supports a direct correspondence between  
648 mammalian and zebrafish SWS1:LWS circuits. For example, in contrast to  
649 BCs, among the dendrites of the zebrafish retinal ganglion cells, most UV-  
650 opponent signals occur above the IPL midline, near the anatomical border  
651 between the traditional On- and Off-layers<sup>21</sup>. Nevertheless, this is  
652 approximately in line with the IPL position where several of the well-studied  
653 primate SWS1:LWS ganglion cells receive LWS-biased Off-inputs<sup>61</sup>, hinting  
654 that similar ganglion cell motifs might also exist in zebrafish. Certainly,  
655 zebrafish do possess a number of anatomical retinal ganglion cell types<sup>21,62</sup>  
656 that display similar stratification patterns compared to those that carry  
657 SWS1:LWS opponent signals in diverse mammals<sup>50,53</sup>.

658 A summary of the above argument, showcasing possible links between  
659 retinal circuits for colour vision in cone-tetrachromatic species such as  
660 zebrafish, to those of most non-primate mammals and of old-world  
661 monkeys including humans, is suggested in [Figure 8](#). In the future it will be  
662 important to explore if and how mammalian SWS1:LWS circuits can be  
663 more directly linked with those found in zebrafish, for example by  
664 leveraging molecular markers across potentially homologous types of  
665 neurons<sup>36,63,64</sup>.

666

## 667 **METHODS**

### 668 **RESOURCE AVAILABILITY**

#### 669 ***Lead Contact***

670 Further information and requests for resources and reagents should be  
671 directed to and will be fulfilled by the Lead Contact, Tom Baden  
672 (t.baden@sussex.ac.uk).

673 ***Data and Code Availability.*** Pre-processed functional 2-photon imaging  
674 data and associated summary statistics will be made freely available on  
675 DataDryad and via the relevant links on <http://www.badenlab.org/resources>  
676 and <http://www.retinal-functomics.net>.

### 677 **EXPERIMENTAL MODEL AND SUBJECT DETAILS**

678 ***Animals.*** All procedures were performed in accordance with the UK  
679 Animals (Scientific Procedures) act 1986 and approved by the animal  
680 welfare committee of the University of Sussex. Animals were housed  
681 under a standard 14:10 day/night rhythm and fed three times a day.  
682 Animals were grown in 0.1 mM 1-phenyl-2-thiourea (Sigma, P7629) from 1  
683 *dpf* to prevent melanogenesis. For all experiments, we used 6-7 days post  
684 fertilization (*dpf*) zebrafish (*Danio rerio*) larvae.

685 Tg(1.8ctbp2:SyjGCaMP7b) line was generated by injecting pBH-1.8ctbp2-  
686 SyjGCaMP7b-pA plasmid into single-cell stage eggs. Injected fish were  
687 out-crossed with wild-type fish to screen for founders. Positive progenies  
688 were raised to establish transgenic lines. The plasmid was made using the  
689 Gateway system (ThermoFisher, 12538120) with combinations of entry  
690 and destination plasmids as follows: pBH<sup>65</sup> and p5E-1.8ctbp, pME-  
691 SyjGCaMP7b, p3E-pA<sup>66</sup>. Plasmid p5E-1.8ctbp was generated by inserting  
692 a polymerase chain reaction (PCR)-amplified -1.8ctbp fragment<sup>30</sup> into p5E  
693 plasmid and respectively. Plasmid pME-SyjGCaMP7b was generated by

694 replacing GCaMP6f fragment with PCR-amplified jGCaMP7b<sup>67</sup> in pME-  
695 SyGCaMP6f<sup>69</sup> plasmid.  
696 For 2-photon *in-vivo* imaging, zebrafish larvae were immobilised in 2% low  
697 melting point agarose (Fisher Scientific, BP1360-100), placed on a glass  
698 coverslip and submerged in fish water. Eye movements were prevented by  
699 injection of  $\alpha$ -bungarotoxin (1 nL of 2 mg/ml; Tocris, Cat: 2133) into the  
700 ocular muscles behind the eye.

## 701 METHOD DETAILS

702 **Light Stimulation.** With fish mounted on their side with one eye facing  
703 upwards towards the objective, light stimulation was delivered as full-field  
704 flashes from a spectrally broad liquid waveguide with a low numerical  
705 aperture (NA 0.59, 77555 Newport), positioned next to the objective at  
706  $\sim 45^\circ$ , as described previously<sup>26</sup>. To image different regions in the eye, the  
707 fish was rotated each time to best illuminate the relevant patch of  
708 photoreceptors given this stimulator-geometry. The other end of the  
709 waveguide was positioned behind a collimator-focussing lens complex  
710 (Thorlabs, ACL25416U-A, LD4103) which collected the light from a  
711 diffraction grating that was illuminated by 13 spectrally distinct light-emitting  
712 diodes (LEDs, details below).

713 An Arduino Due (Arduino) and LED driver (Adafruit TCL5947) were used to  
714 control and drive the LEDs, respectively. Each LED could be individually  
715 controlled, with brightness defined via 12-bit depth pulse-width-modulation  
716 (PWM). To time-separate scanning and stimulating epochs, a global  
717 “blanking” signal was used to switch off all LEDs during 2P scanning but  
718 enable them during the retrace, at line-rate of 1 kHz (see also Refs<sup>68,70</sup>).  
719 The stimulator code is available at  
720 <https://github.com/BadenLab/HyperspectralStimulator>.

721  
722 LEDs used were: Multicomp Pro: MCL053RHC, Newark: C503B-RAN-  
723 CZ0C0AA1, Roithner: B5-435-30S, Broadcom: HLMP-EL1G-130DD,  
724 Roithner: LED-545-01, TT Electronics: OVLGC0C6B9, Roithner: LED-490-  
725 06, Newark: SSL-LX5093USBC, Roithner: LED450-03, VL430-5-1,  
726 LED405-03V, VL380-5-15, XSL-360-5E. Effective LED peak spectra as  
727 measured at the sample plane were, respectively (in nm): 655, 635, 622,  
728 592, 550, 516, 501, 464, 448, 427, 407, 381, 360 nm. Their maximal power  
729 outputs were, respectively (in  $\mu$ W): 1.31, 1.06, 0.96, 0.62, 1.26, 3.43, 1.47,  
730 0.44, 3.67, 0.91, 0.24, 0.23, 0.20. From here, the first ten LEDs (655 – 427  
731 nm) were adjusted to 0.44  $\mu$ W, while the three UV-range LEDs were set to  
732 a reduced power of 0.2  $\mu$ W. This relative power reduction in the UV-range  
733 was used as a compromise between presenting similar power stimulation  
734 across all LEDs, while at the same time ameliorating response-saturation  
735 in the UV-range as a result of the UV-cones’ disproportionately high light  
736 sensitivity<sup>21,69</sup>. The same strategy was used previously to record from  
737 cones<sup>26</sup>.

738  
739 **2-photon calcium imaging.** All 2-photon (2P) imaging was performed on  
740 a MOM-type 2P microscope (designed by W. Denk, MPI, Martinsried;  
741 purchased through Sutter Instruments/Science Products) equipped with a  
742 mode-locked Ti:Sapphire laser (Chameleon Vision-S, Coherent) tuned to  
743 927 nm for SyGCaMP6f imaging. We used one fluorescence detection  
744 channel (F48x573, AHF/Chroma), and a water immersion objective (W  
745 Plan-Apochromat 20x/1,0 DIC M27, Zeiss). For image acquisition, we used  
746 custom-written software (ScanM, by M. Mueller, MPI, Martinsried and T.

747 Euler, CIN, Tuebingen) running under IGOR pro 6.3 for Windows  
748 (Wavemetrics).

749 All data was collected using a quasi-simultaneous triplane approach by  
750 leveraging an electrically tunable lens (ETL, EL-16-40-TC-20D, Optotune)  
751 positioned prior to the scan-mirrors. Rapid axial-jumps of ~15  $\mu\text{m}$  between  
752 scan planes (ETL settling time of <2 ms<sup>31</sup>) were enabled by using a non-  
753 telecentric (nTC) optical configuration (nTC<sub>1</sub>, 1.2 mm – see Ref<sup>31</sup>). This  
754 nTC optical setup is described in detail elsewhere<sup>31</sup>. All recordings were  
755 taken at 128 x 64 pixels/plane at 3 planes (5.2 Hz effective “volume” rate at  
756 1 ms per scan line).

757  
758 ***Pre-processing of 2-photon data, IPL detection and ROI placement.***

759 Raw fluorescence stacks were exported into a Python 3 (Anaconda)  
760 environment. The data were de-interleaved and separated into the three  
761 recording planes. Next, the data were linearly detrended, linearly  
762 interpolated to 42 Hz, and aligned in time. The anatomical borders of the  
763 inner plexiform layers were automatically detected by first median-  
764 smoothing the time standard deviation images with a Gaussian kernel size  
765 of 3 pixels. From here, every pixel above the 35% per-image amplitude  
766 threshold was registered as IPL. This automated procedure was made  
767 possible by the fact that GCaMP6f expression was restricted to the  
768 presynaptic terminals of BCs, which also defined the anatomical borders of  
769 the IPL.

770 To place regions of interest (ROI), a quality index (QI) as described  
771 previously<sup>33</sup> was calculated for each pixel. In short, the QI measures the  
772 ratio of variance shared between stimulus repetitions and within a single  
773 stimulus repetition. The larger the QI, the more variance in the trace is due  
774 to the presented stimulus:

$$QI = \frac{\text{Var}C_{r,t}}{\text{Var}C_{t,r}}$$

775  
776 where  $C$  is the  $T$  by  $R$  response matrix (time samples by stimulus  
777 repetitions) and  $x$  and  $\text{Var}[x]$  denote the mean and variance across the  
778 indicated dimension, respectively. QI ranges from 0 (perfectly random) to 1  
779 (all stimulus repetition responses are identical). This yielded “QI-images”  
780 that indicated where in a scan BC-responses were located. From here,  
781 ROIs were automatically placed using custom Python scikit-image  
782 scripts<sup>71</sup>. In brief, QI-images were adaptively thresholded using kernel size  
783 5. The resulting binary images were distance-transformed and shrunk. The  
784 contours of the remaining groups of pixels were recorded and filled, and  
785 the highlighted pixels were used as ROI coordinates. From here, the IPL  
786 position of each ROI was defined as the relative position of the centre-of-  
787 mass of the filled ROI contour to the nearest inner and outer borders of the  
788 IPL.

789 ROI traces were converted to z-scores. For this, a 5 s portion of the trace  
790 preceding stimulus presentation was drawn and defined as baseline. The  
791 standard deviation of this baseline fluorescence signal was calculated and  
792 used to z-score the remainder of the trace. Finally, QIs as described above  
793 for each pixel were also calculated for each ROI. ROIs with  $QI < 0.4$  were  
794 excluded from further analysis.  $n = 6,125$  ROIs passed this quality criterion  
795 (72 triplane scans from 7 fish).

796  
797 ***Clustering of BCs.*** To identify structure amongst the BC-dataset, trial-  
798 averaged ROI traces were PCA-transformed and clustered as described  
799 previously (e.g. Refs<sup>18,33</sup>). In brief, we used the first 48 principal

800 components, which accounted for 82% of total variance. Of these,  
801 components that near-exclusively carried high-frequency content which is  
802 likely linked to noise were discarded. The transformed time-traces were  
803 clustered using the scikit-learn (Python 3, Anaconda) implementation of the  
804 Gaussian Mixture Models algorithm. The number of clusters was  
805 determined using the Bayesian information criterion (BIC). Clusters were  
806 judged as stable over repeated clustering runs starting from different  
807 random seeds.

### 809 ***Reconstruction of BC responses from cones.***

810 To reconstruct each BC-mean response into constituent spectral and  
811 temporal components, we combined the average spectral tuning curve of  
812 each of the four cone-types (from Ref<sup>26</sup>) with four temporal components  
813 associated with a given light response (i.e. 3 s On, 3 s Off). The four  
814 temporal components used, obtained by non-negative matrix factorisation  
815 across all light responses and cluster means, resembled light-transient,  
816 light-sustained, dark-transient, and dark-sustained temporal profiles ([Figure](#)  
817 [3B](#)). Next, each full BC-cluster mean trace was decomposed into a  
818 corresponding 4 by 10 array (four temporal components X 10 LEDs; note  
819 that we restricted the reconstruction to the central 10 LEDs that generally  
820 elicited the greatest variance across BCs). This yielded four spectral tuning  
821 curves per BC (i.e. light-transient x 10 LEDs, light-sustained x 10 LEDs and  
822 so on), which were then linearly interpolated to the range of 360 - 610 nm  
823 to conform with the cone data format. The BC tuning curves were then  
824 modelled as linear combinations of the cone tuning curves with a lasso  
825 regulariser, which yielded four cone weights X four response bases per  
826 BC-trace.

827 To assess reconstruction quality ([Figure S1](#)), reconstructed data was  
828 subtracted from the original ROI-means to yield residuals. From here, we  
829 compared original data, reconstructions, and residuals by two metrics:  
830 variance explained across all clusters, and temporal power explained. To  
831 determine the fraction of variance explained by the reconstructions, we first  
832 computed the total variance across all clusters for each time-point. The  
833 result of this process, plotted beneath each corresponding heatmap  
834 ([Figure S1A](#)), showed similar time-variance profiles across cluster means  
835 and their reconstructions (panels 1 and 2), but very little remaining signal  
836 for the residuals (panel 3). From here, we computed the area under the  
837 curve for each variance-trace and normalised each to the result from the  
838 original cluster means. By this metric, cluster reconstructions captured  
839 94.0% of the original variance, while residuals carried 5.1%.

840 To determine the extent to which temporal structure was captured, we  
841 used a similar approach to the one above, however in this case based on a  
842 magnitude-squared Fourier Transform of each time-trace ([Figure S1B](#)),  
843 limiting the result between 0.08 and 2 Hz which captured the bulk of  
844 physiologically meaningful temporal components given the optical imaging  
845 approach used (i.e. lower-frequency components would mainly arise from  
846 imperfect detrending, while higher-frequency components would exceed  
847 the Nyquist recording limit, and further be limited by the kinetics of  
848 GCaMP7b. From here, we computed the average of all clusters' Fourier  
849 transforms (plotted beneath each panel) and again computed the fraction of  
850 this signal captured by the reconstruction (103.8%) and residuals (3.8%).  
851 Notably, while this metric was mainly informative about low frequency  
852 components which dominated all signals, also higher frequency  
853 components were generally well captured, as visible in the individual  
854 heatmaps.

855  
856

## QUANTIFICATION AND STATISTICAL ANALYSIS

857  
858  
859  
860  
861  
862  
863  
864  
865  
866  
867

**Statistics.** No statistical methods were used to predetermine sample size. Owing to the exploratory nature of our study, we did not use randomization or blinding. To compare weight amplitude distributions (Figure 5A,B) we used the paired Wilcoxon Rank Sum Test, taking paired components as the input (i.e. comparing red-light-transient versus green-light-transient, and so on). To assess weight correlations between cones (Figure 5C-E, Figure S1), we in each case list the Pearson correlation coefficient  $\rho$  and 95% confidence intervals (CI) based on the mean weights per cluster. Individual temporal weights were not considered in this analysis. All statistical analysis was performed in Python 3 (Anaconda) and/or Igor Pro 6 (Wavemetrics).

## 868 REFERENCES

869  
870  
871  
872  
873  
874  
875  
876  
877  
878  
879  
880  
881  
882  
883  
884  
885  
886  
887  
888  
889  
890  
891  
892  
893  
894  
895  
896  
897  
898  
899  
900  
901  
902

1. Baden, T., and Osorio, D. (2019). The Retinal Basis of Vertebrate Color Vision. *Annu. Rev. Vis. Sci.* 5, 177–200.
2. Jacobs, G.H. (1996). Primate photopigments and primate color vision. *Proc. Natl. Acad. Sci.*
3. Field, G.D., Gauthier, J.L., Sher, A., Greschner, M., Machado, T.A., Jepson, L.H., Shlens, J., Gunning, D.E., Mathieson, K., Dabrowski, W., et al. (2010). Functional connectivity in the retina at the resolution of photoreceptors. *Nature* 467, 673–7.
4. Dacey, D.M. (2000). Parallel pathways for spectral coding in primate retina. *Annu. Rev. Neurosci.* 23, 743–775.
5. Buchsbaum, G., and Gottschalk, A. (1983). Trichromacy, opponent colours coding and optimum colour information transmission in the retina. *Proc. R. Soc. Lond. B. Biol. Sci.* 220, 89–113.
6. Dacey, D.M., and Packer, O.S. (2003). Colour coding in the primate retina: Diverse cell types and cone-specific circuitry. *Curr. Opin. Neurobiol.* 13, 421–427.
7. Jacobs, G.H., and Rowe, M.P. (2004). Evolution of vertebrate colour vision. *Clin. Exp. Optom.* 87, 206–216.
8. Baden, T. (2021). Circuit-mechanisms for colour vision in zebrafish. *Curr. Biol.* 31, PR807-R80.
9. Meier, A., Nelson, R., and Connaughton, V.P. (2018). Color Processing in Zebrafish Retina. *Front. Cell. Neurosci.* 12, 1–19.
10. Musilova, Z., Salzburger, W., and Cortesi, F. (2021). The Visual Opsin Gene Repertoires of Teleost Fishes: Evolution, Ecology, and Function. *Annu. Rev. Cell Dev. Biol.* 37.
11. Li, Y.N., Tsujimura, T., Kawamura, S., and Dowling, J.E. (2012). Bipolar cell-photoreceptor connectivity in the zebrafish (*Danio rerio*) retina. *J. Comp. Neurol.* 520, 3786–3802.
12. Li, Y.N., Matsui, J.I., and Dowling, J.E. (2009). Specificity of the horizontal cell-photoreceptor connections in the zebrafish (*Danio rerio*) retina. *J. Comp. Neurol.* 516, 442–53.
13. Klaassen, L.J., de Graaff, W., Van Asselt, J.B., Klooster, J., and Kamermans, M. (2016). Specific connectivity between photoreceptors and horizontal cells in the zebrafish retina. *J. Neurophysiol.* 116, 2799–2814.
14. Yamagata, M., Yan, W., and Sanes, J.R. (2021). A cell atlas of the chick retina based on single-cell transcriptomics. *Elife* 10, 1–39.
15. Günther, A., Dedek, K., Haverkamp, S., Irsen, S., Briggman, K.L., and Mouritsen, H. (2021). Double cones and the diverse connectivity of photoreceptors and bipolar cells in an avian retina. *J. Neurosci.* 41, 5015–5028.
16. Seifert, M., Baden, T., and Osorio, D. (2020). The retinal basis of vision in chicken. *Semin Cell Dev Biol* 106, 106–115.
17. Rocha, F.A.F., Saito, C.A., Silveira, L.C.L., De Souza, J.M., and Ventura, D.F. (2008). Twelve chromatically opponent ganglion cell types in turtle retina. In *Visual Neuroscience*, pp. 307–315.
18. Zimmermann, M.J.Y., Nevala, N.E., Yoshimatsu, T., Osorio, D., Nilsson, D.-E., Berens, P., and Baden, T.



- 903 (2018). Zebrafish Differentially Process Color across Visual Space to Match Natural Scenes. *Curr. Biol.* 28,  
904 2018-2032.e5.
- 905 19. Daw, N.W. (1968). Colour-coded ganglion cells in the goldfish retina: extension of their receptive fields by  
906 means of new stimuli. *J. Physiol.* 197, 567–592.
- 907 20. Guggiana Nilo, D.A., Riegler, C., Hübener, M., and Engert, F. (2021). Distributed chromatic processing at the  
908 interface between retina and brain in the larval zebrafish. *Curr. Biol.*, S0960-9822(21)00153–6.
- 909 21. Zhou, M., Bear, J., Roberts, P.A., Janiak, F.K., Semmelhack, J., Yoshimatsu, T., and Baden, T. (2020).  
910 Zebrafish Retinal Ganglion Cells Asymmetrically Encode Spectral and Temporal Information across Visual  
911 Space. *Curr. Biol.* 30, 2927-2942.e7.
- 912 22. Torvund, M.M., Ma, T.S., Connaughton, V.P., Ono, F., and Nelson, R.F. (2017). Cone signals in  
913 monostратified and bistratified amacrine cells of adult zebrafish retina. *J. Comp. Neurol.* 525, 1532–1557.
- 914 23. Kamermans, M., van Dijk, B.W., and Spekrijse, H. (1991). Color opponency in cone-driven horizontal cells in  
915 carp retina. A specific pathways between cones and horizontal cells. *J. Gen. Physiol.* 97, 819–843.
- 916 24. Kamar, S., Howlett, M.H.C., and Kamermans, M. (2019). Silent-substitution stimuli silence the light responses  
917 of cones but not their output. *J. Vis.* 19, 1–11.
- 918 25. Connaughton, V.P., and Nelson, R. (2010). Spectral Responses in Zebrafish Horizontal Cells Include a  
919 Tetraphasic Response and a Novel UV-Dominated Triphasic Response. *J. Neurophysiol.* 104, 2407–2422.
- 920 26. Yoshimatsu, T., Bartel, P., Schröder, C., Janiak, F.K., St-Pierre, F., Berens, P., and Baden, T. (2020).  
921 Ancestral circuits for vertebrate colour vision emerge at the first retinal synapse. *bioRxiv*, 2020.10.26.356089.
- 922 27. Euler, T., Haverkamp, S., Schubert, T., and Baden, T. (2014). Retinal Bipolar Cells: Elementary Building  
923 Blocks of Vision. *Nat. Rev. Neurosci.* 15, 507–519.
- 924 28. Bartel, P., Janiak, F.K., Osorio, D., and Baden, T. (2021). Colourfulness as a possible measure of object  
925 proximity in the larval zebrafish brain. *Curr. Biol.* 31, R235–R236.
- 926 29. Rosa, J.M., Rühle, S., Ding, H., and Lagnado, L. (2016). Crossover Inhibition Generates Sustained Visual  
927 Responses in the Inner Retina. *Neuron* 90, 308–319.
- 928 30. Dreosti, E., Odermatt, B., Dorostkar, M.M., and Lagnado, L. (2009). A genetically encoded reporter of  
929 synaptic activity in vivo. *Nat. Methods* 6, 883–9.
- 930 31. Janiak, F.K., Bartel, P., Bale, M., Yoshimatsu, T., Komulainen, E.H., Zhou, M., Staras, K., Prieto-Godino, L.L.,  
931 Euler, T., Maravall, M., et al. (2019). Divergent excitation two photon microscopy for 3D random access  
932 mesoscale imaging at single cell resolution. *bioRxiv*, 10.1101/821405.
- 933 32. Belušič, G., Ilić, M., Meglič, A., Pirih, P., Mogdans, J., Coombs, S.L., Daneu, V., Chann, B., Huang, R., and  
934 Fujikado, T. (2016). A fast multispectral light synthesiser based on LEDs and a diffraction grating. *Sci. Rep.* 6,  
935 32012.
- 936 33. Baden, T., Berens, P., Franke, K., Roman-Roson, M., Bethge, M., and Euler (2016). The functional diversity  
937 of mouse retinal ganglion cells. *Nature*, 1–21.
- 938 34. Franke, K., Berens, P., Schubert, T., Bethge, M., Euler, T., and Baden, T. (2017). Inhibition decorrelates  
939 visual feature representations in the inner retina. *Nature* 542, 439–444.
- 940 35. Behrens, C., Schubert, T., Haverkamp, S., Euler, T., Berens, P., Baden, T., Schubert, T., Chang, L., Wei, T.,  
941 Zaichuk, M., et al. (2016). Connectivity map of bipolar cells and photoreceptors in the mouse retina. *Elife* 5,  
942 1206–1217.
- 943 36. Shekhar, K., Lapan, S.W., Whitney, I.E., Tran, N.M., Macosko, E.Z., Kowalczyk, M., Adiconis, X., Levin, J.Z.,  
944 Nemes, J., Goldman, M., et al. (2016). Comprehensive Classification of Retinal Bipolar Neurons by Single-  
945 Cell Transcriptomics. *Cell* 166, 1308-1323.e30.
- 946 37. Connaughton, V.P., Graham, D., and Nelson, R. (2004). Identification and morphological classification of  
947 horizontal, bipolar, and amacrine cells within the zebrafish retina. *J. Comp. Neurol.* 477, 371–385.
- 948 38. Connaughton, V.P., and Nelson, R. (2000). Axonal stratification patterns and glutamate-gated conductance  
949 mechanisms in zebrafish retinal bipolar cells. *J. Physiol.* 524 Pt 1, 135–46.
- 950 39. Connaughton, V.P., and Maguire, G. (1998). Differential expression of voltage-gated K<sup>+</sup> and Ca<sup>2+</sup> currents in  
951 bipolar cells in the zebrafish retinal slice. *Eur. J. Neurosci.* 10, 1350–1362.
- 952 40. Behrens, C., Zhang, Y., Yadav, S.C., Haverkamp, S., Irsen, S., Korympidou, M., Schaedler, A., Dedek, K.,

- 953 Smith, R., Euler, T., et al. (2019). Retinal horizontal cells use different synaptic sites for global feedforward  
954 and local feedback signaling. *bioRxiv*, 780031.
- 955 41. Westheimer, G. (2007). The ON-OFF dichotomy in visual processing: From receptors to perception. *Prog.*  
956 *Retin. Eye Res.* 26, 636–648.
- 957 42. DeVries, S.H., Li, W., and Saszik, S. (2006). Parallel processing in two transmitter microenvironments at the  
958 cone photoreceptor synapse. *Neuron* 50, 735–48.
- 959 43. Baden, T., Berens, P., Bethge, M., and Euler, T. (2013). Spikes in mammalian bipolar cells support temporal  
960 layering of the inner retina.
- 961 44. Roska, B., and Werblin, F. (2001). Vertical interactions across ten parallel, stacked representations in the  
962 mammalian retina. *Nature* 410, 583–7.
- 963 45. Matsumoto, A., Briggman, K.L., and Yonehara, K. (2019). Spatiotemporally Asymmetric Excitation Supports  
964 Mammalian Retinal Motion Sensitivity. *Curr. Biol.*
- 965 46. Atick, J.J., Li, Z., and Redlich, A.N. (1992). Understanding Retinal Color Coding from First Principles. *Neural*  
966 *Comput.* 4, 559–572.
- 967 47. Neumeier, C. (1992). Tetrachromatic color vision in goldfish: evidence from color mixture experiments. *J.*  
968 *Comp. Physiol. A.*
- 969 48. Fornetto, C., Tiso, N., Pavone, F.S., and Vanzi, F. (2020). Colored visual stimuli evoke spectrally tuned  
970 neuronal responses across the central nervous system of zebrafish larvae. *BMC Biol.* 18, 1–17.
- 971 49. Neitz, J., and Neitz, M. (2017). Evolution of the circuitry for conscious color vision in primates. *Eye* 31, 286–  
972 300.
- 973 50. Marshak, D.W., and Mills, S.L. (2014). Short-wavelength cone-opponent retinal ganglion cells in mammals.  
974 *Vis. Neurosci.* 31, 165–175.
- 975 51. Jacobs, G.H. (1993). The distribution and nature of colour vision among the mammals. *Biol Rev Camb Philos*  
976 *Soc* 68, 413–471.
- 977 52. Chen, S., and Li, W. (2012). A color-coding amacrine cell may provide a blue-Off signal in a mammalian  
978 retina. *Nat. Neurosci.* 15, 954–956.
- 979 53. Mills, S.L., Tian, L.-M., Hoshi, H., Whitaker, C.M., and Massey, S.C. (2014). Three distinct blue-green color  
980 pathways in a mammalian retina. *J. Neurosci.* 34, 1760–8.
- 981 54. Szatko, K.P., Korympidou, M.M., Ran, Y., Berens, P., Dalkara, D., Schubert, T., Euler, T., and Franke, K.  
982 (2020). Neural circuits in the mouse retina support color vision in the upper visual field. *Nat. Commun.* 11,  
983 3481.
- 984 55. Khani, M.H., and Gollisch, T. (2021). Linear and nonlinear chromatic integration in the mouse retina. *Nat.*  
985 *Commun.* 12, 1–21.
- 986 56. Packer, O.S., Verweij, J., Li, P.H., Schnapf, J.L., and Dacey, D.M. (2010). Blue-yellow opponency in primate  
987 S cone photoreceptors. *J. Neurosci.* 30, 568–572.
- 988 57. Breuninger, T., Puller, C., Haverkamp, S., and Euler, T. (2011). Chromatic bipolar cell pathways in the mouse  
989 retina. *J. Neurosci.* 31, 6504–6517.
- 990 58. Dacey, D.M., and Lee, B.B. (1994). The “blue-on” opponent pathway in primate retina originates from a  
991 distinct bistratified ganglion cell type. *Nature* 367, 731–5.
- 992 59. Ghosh, K.K., and Grünert, U. (1999). Synaptic input to small bistratified (blue-ON) ganglion cells in the retina  
993 of a new world monkey, the marmoset *Callithrix jacchus*. *J. Comp. Neurol.* 413, 417–428.
- 994 60. Nadal-Nicolás, F.M., Kunze, V.P., Ball, J.M., Peng, B.T., Krisnan, A., Zhou, G., Dong, L., and Li, W. (2020).  
995 True S-cones are concentrated in the ventral mouse retina and wired for color detection in the upper visual  
996 field. *Elife* 9, 1–30.
- 997 61. Calkins, D.J., Tsukamoto, Y., and Sterling, P. (1998). Microcircuitry and mosaic of a blue-yellow ganglion cell  
998 in the primate retina. *J. Neurosci.* 18, 3373–85.
- 999 62. Robles, E., Laurell, E., and Baier, H. (2014). The Retinal Projectome Reveals Brain-Area-Specific Visual  
1000 Representations Generated by Ganglion Cell Diversity. *Curr. Biol.* 24, 2085–2096.
- 1001 63. Peng, Y.-R., Shekhar, K., Yan, W., Herrmann, D., Sappington, A., Bryman, G.S., van Zyl, T., Do, M.T.H.,

- 1002 Regev, A., and Sanes, J.R. (2019). Molecular Classification and Comparative Taxonomics of Foveal and  
1003 Peripheral Cells in Primate Retina. *Cell* 176, 1222-1237.e22.
- 1004 64. Kölsch, Y., Hahn, J., Sappington, A., Stemmer, M., Fernandes, A.M., Helmbrecht, T.O., Lele, S., Butrus, S.,  
1005 Laurell, E., Arnold-Ammer, I., et al. (2020). Molecular classification of zebrafish retinal ganglion cells links  
1006 genes to cell types to behavior. *Neuron* 109, 645-662.e9.
- 1007 65. Yoshimatsu, T., D'Orazi, F.D., Gamlin, C.R., Suzuki, S.C., Suli, A., Kimelman, D., Raible, D.W., and Wong,  
1008 R.O. (2016). Presynaptic partner selection during retinal circuit reassembly varies with timing of neuronal  
1009 regeneration in vivo. *Nat. Commun.* 7, 10590.
- 1010 66. Kwan, K.M., Fujimoto, E., Grabher, C., Mangum, B.D., Hardy, M.E., Campbell, D.S., Parant, J.M., Yost, H.J.,  
1011 Kanki, J.P., and Chien, C.-B. (2007). The Tol2kit: A multisite gateway-based construction kit for Tol2  
1012 transposon transgenesis constructs. *Dev. Dyn.* 236, 3088–3099.
- 1013 67. Dana, H., Sun, Y., Mohar, B., Hulse, B.K., Kerlin, A.M., Hasseman, J.P., Tsegaye, G., Tsang, A., Wong, A.,  
1014 Patel, R., et al. (2019). High-performance calcium sensors for imaging activity in neuronal populations and  
1015 microcompartments. *Nat. Methods* 16, 649–657.
- 1016 68. Euler, T., Franke, K., and Baden, T. (2019). Studying a light sensor with light: Multiphoton imaging in the  
1017 retina. In *Neuromethods*.
- 1018 69. Yoshimatsu, T., Schröder, C., Nevala, N.E., Berens, P., and Baden, T. (2020). Fovea-like Photoreceptor  
1019 Specializations Underlie Single UV Cone Driven Prey-Capture Behavior in Zebrafish. *Neuron* 107, 320-  
1020 337.e6.
- 1021 70. Zimmermann, M.J.Y., Maia Chagas, A., Bartel, P., Pop, S., Prieto-Godino, L.L., and Baden, T. (2020). LED  
1022 Zappelin': An open source LED controller for arbitrary spectrum visual stimulation and optogenetics during 2-  
1023 photon imaging. *HardwareX*.
- 1024 71. Van Der Walt, S., Schönberger, J.L., Nunez-Iglesias, J., Boulogne, F., Warner, J.D., Yager, N., Gouillart, E.,  
1025 and Yu, T. (2014). Scikit-image: Image processing in python. *PeerJ* 2014, e453.
